# Supplementary material for: Magneli-type tungsten oxide nanorods as catalysts for the selective oxidation of organic sulfides
Source: Royal Society of Chemistry journal article supplement (doi:10.1039/d1dt02243a), 2021-01-01
Supplement: d1dt02243a1.pdf [file d1dt02243a1.pdf]

## Supporting Information

### **Magneli-Type Tungsten Oxide Nanorods as Catalysts for the Selective Oxidation of Organic Sulfides**

René Dören<sup>a</sup>, Jens Hartmann<sup>a</sup>, Benjamin Leibauer, Martin Panthöfer, Mihail Mondeshki, and Wolfgang Tremel\*

<sup>a</sup> These authors contributed equally to this work.

Department Chemie, Johannes Gutenberg-Universität Mainz, Duesbergweg 10-14, D-55128 Mainz, Germany

## Table of Contents

|                                                                                                                                                                                                                                                                                                                                                                                                                           |     |
|---------------------------------------------------------------------------------------------------------------------------------------------------------------------------------------------------------------------------------------------------------------------------------------------------------------------------------------------------------------------------------------------------------------------------|-----|
| <b>TABLE S1.</b> PRODUCT COMPOSITION WITH ADDITIONAL WATER TO STANDARD <i>IN SITU</i> EXPERIMENT (0.85 MG WO <sub>3-x</sub> NANORODS, 0.04 MMOL THIOANISOLE, 0.06 MMOL H <sub>2</sub> O <sub>2</sub> (60%) IN 0.6 ML METHANOL-D <sub>4</sub> ). .....                                                                                                                                                                     | S6  |
| <b>TABLE S2.</b> FIT PARAMETERS FOR WATER CURVES ACCORDING TO THE EQUATION ABOVE. ....                                                                                                                                                                                                                                                                                                                                    | S6  |
| <b>TABLE S3.</b> PRODUCT COMPOSITION AFTER ANNEALING AT DIFFERENT TEMPERATURES FOR STANDARD <i>IN SITU</i> EXPERIMENT (0.85 MG WO <sub>3-x</sub> NANORODS, 0.04 MMOL THIOANISOLE, 0.06 MMOL H <sub>2</sub> O <sub>2</sub> (60%) IN 0.6 ML METHANOL-D <sub>4</sub> ). ....                                                                                                                                                 | S7  |
| <b>TABLE S4.</b> BET SURFACE AREA AND Z – POTENTIAL OF NANOPARTICLES USED FOR SULFIDE OXIDATION. ....                                                                                                                                                                                                                                                                                                                     | S8  |
| <br><b>FIG. S1.</b> PAWLEY REFINEMENTS OF WO <sub>3-x</sub> NRS ANNEALED AT 300°C USING SPACE GROUP <i>P2<sub>1</sub>/M</i> AND A QUADRATIC FORM TO COMPENSATE THE ANISOTROPY. <sup>1</sup> REFINED PARAMETERS ARE: R <sub>WP</sub> : 2.23, GOF: 1.08, CRYSTAL SIZE (A*B*C): 4.1*72.6*4.3 NM. LATTICE PARAMETERS: A=18.196 Å, B=3.794 Å AND C= 14.000 Å. ....                                                             | S9  |
| <b>FIG. S2.</b> TEM IMAGES OF WO <sub>3-x</sub> NANORODS ANNEALED AT (A) 300 °C, (B) 400 °C, (C) 500 °C AND (D) AFTER SIX REACTION CYCLES. (E) P-XRD PATTERNS OF ANNEALED WO <sub>3-x</sub> NANORODS UP TO 500 °C AND (F) AFTER FIVE REACTION CYCLES. REFERENCES: W <sub>18</sub> O <sub>49</sub> (WO <sub>2.72</sub> , COD, ENTRY NO.: 96-152-8167), WO <sub>3</sub> (MONOCLINIC, COD, ENTRY NO.: 96-152-8916). ....     | S10 |
| <b>FIG. S3.</b> (A) TEM IMAGE AND (B) P-XRD PATTERN OF CeO <sub>2</sub> NANOPARTICLES. REFERENCE: CERIANITE (CeO <sub>2</sub> ), COD, ENTRY NO.: 96-900-9009). ....                                                                                                                                                                                                                                                       | S11 |
| <b>FIG. S4.</b> (A) <sup>1</sup> H-NMR SPECTRA OF A STANDARD CATALYSIS (0.04 MMOL THIOANISOLE, 0.06 MMOL H <sub>2</sub> O <sub>2</sub> (60 %), 0.85 MG WO <sub>3-x</sub> NANORODS IN 0.6 ML OF METHANOL-D <sub>4</sub> ) AFTER 10 AND 30 MIN, X MARKING THE PEAKS USED FOR INTEGRATION. (B) TIME DEPENDENT COMPOSITION DURING THE CATALYSIS BASED ON <sup>1</sup> H-NMR DATA. ....                                        | S13 |
| <b>FIG. S5.</b> (A) <sup>1</sup> H-NMR SPECTRA OF A CATALYSIS WITH DOUBLE AMOUNTS (0.08 MMOL THIOANISOLE, 0.12 MMOL H <sub>2</sub> O <sub>2</sub> (60 %), 1.7 MG WO <sub>3-x</sub> NANORODS IN 0.6 ML OF METHANOL-D <sub>4</sub> ) AFTER 10 AND 30 MIN, X MARKING THE PEAKS USED FOR INTEGRATION. (B) TIME DEPENDENT COMPOSITION DURING THE CATALYSIS BASED ON <sup>1</sup> H-NMR DATA. ....                              | S14 |
| <b>FIG. S6.</b> (A) <sup>1</sup> H-NMR SPECTRA OF A CATALYSIS WITH WATER INFLUENCE (0.04 MMOL THIOANISOLE, 0.06 MMOL H <sub>2</sub> O <sub>2</sub> (60 %), 0.85 MG WO <sub>3-x</sub> NANORODS IN 0.4 ML OF METHANOL-D <sub>4</sub> AND 0.2 ML D <sub>2</sub> O) AFTER 10 AND 30 MIN, X MARKING THE PEAKS USED FOR INTEGRATION. (B) TIME-DEPENDENT COMPOSITION DURING THE CATALYSIS BASED ON <sup>1</sup> H-NMR DATA. .... | S15 |
| <b>FIG. S7.</b> <sup>1</sup> H-NMR SPECTRA OF A STANDARD CATALYSIS (0.04 MMOL THIOANISOLE, 0.12 MMOL H <sub>2</sub> O <sub>2</sub> (60 %), 0.85 MG WO <sub>3-x</sub> NANORODS IN 0.6 ML OF METHANOL-D <sub>4</sub> ) AFTER 10 MIN, 30 MIN, 22H AND 13 D, X MARKING THE PEAKS USED FOR INTEGRATION. ....                                                                                                                   | S16 |
| <b>FIG. S8.</b> (A) <sup>1</sup> H-NMR SPECTRA OF AN OXIDATION CATALYSIS USING SULFOXIDES (0.04 MMOL MP-SULFONE, 0.06 MMOL H <sub>2</sub> O <sub>2</sub> (60 %), 0.85 MG WO <sub>3-x</sub> NANORODS IN 0.6 ML OF METHANOL-D <sub>4</sub> ) AFTER 10 AND 30 MIN,                                                                                                                                                           |     |

|                  |                                                                                                                                                                                                                                                                                                                                                                                                       |     |
|------------------|-------------------------------------------------------------------------------------------------------------------------------------------------------------------------------------------------------------------------------------------------------------------------------------------------------------------------------------------------------------------------------------------------------|-----|
|                  | X MARKING THE PEAKS USED FOR INTEGRATION. (B) TIME-DEPENDENT COMPOSITION DURING THE CATALYSIS BASED ON <sup>1</sup> H-NMR DATA. ....                                                                                                                                                                                                                                                                  | S17 |
| <b>FIG. S9.</b>  | (A) <sup>1</sup> H-NMR SPECTRA OF A STANDARD OXIDATION CATALYSIS (0.04 MMOL THIOANISOLE, 0.06 MMOL H <sub>2</sub> O <sub>2</sub> (60 %), 0.85 MG Na <sub>2</sub> WO <sub>4</sub> * 2H <sub>2</sub> O IN 0.6 ML OF METHANOL-D <sub>4</sub> ) AFTER 10 AND 30 MIN, X MARKING THE PEAKS USED FOR INTEGRATION. (B) TIME-DEPENDENT COMPOSITION DURING THE CATALYSIS BASED ON <sup>1</sup> H-NMR DATA. .... | S18 |
| <b>FIG. S10.</b> | (A) <sup>1</sup> H-NMR SPECTRA OF A STANDARD CATALYSIS (0.04 MMOL THIOANISOLE, 0.06 MMOL H <sub>2</sub> O <sub>2</sub> (60 %), 0.85 MG CeO <sub>2</sub> NANOPARTICLES IN 0.6 ML OF METHANOL-D <sub>4</sub> ) AFTER 10 AND 30 MIN, X MARKING THE PEAKS USED FOR INTEGRATION. (B) TIME-DEPENDENT COMPOSITION DURING THE CATALYSIS BASED ON <sup>1</sup> H-NMR DATA. ....                                | S19 |
| <b>FIG. S11.</b> | (A) <sup>1</sup> H-NMR SPECTRA OF A CATALYSIS USING SULFOXIDE (0.04 MMOL MP-SULFOXIDE, 0.06 MMOL H <sub>2</sub> O <sub>2</sub> (60 %), 0.85 MG CeO <sub>2</sub> NANOPARTICLES IN 0.6 ML OF METHANOL-D <sub>4</sub> ) AFTER 10 AND 30 MIN, X MARKING THE PEAKS USED FOR INTEGRATION. (B) TIME-DEPENDENT COMPOSITION DURING THE CATALYSIS BASED ON <sup>1</sup> H-NMR DATA. ....                        | S20 |
| <b>FIG. S12.</b> | (A) <sup>1</sup> H-NMR SPECTRA OF A STANDARD CATALYSIS (0.04 MMOL DI-N-PROPYL SULFIDE, 0.06 MMOL H <sub>2</sub> O <sub>2</sub> (60 %), 0.85 MG WO <sub>3-x</sub> NANORODS IN 0.6 ML OF METHANOL-D <sub>4</sub> ) AFTER 10 AND 30 MIN, X MARKING THE PEAKS USED FOR INTEGRATION. (B) TIME-DEPENDENT COMPOSITION DURING THE CATALYSIS BASED ON <sup>1</sup> H-NMR DATA. ....                            | S22 |
| <b>FIG. S13.</b> | (A) <sup>1</sup> H-NMR SPECTRA OF A STANDARD CATALYSIS (0.04 MMOL DI-TERT-BUTYL SULFIDE, 0.06 MMOL H <sub>2</sub> O <sub>2</sub> (60 %), 0.85 MG WO <sub>3-x</sub> NANORODS IN 0.6 ML OF METHANOL-D <sub>4</sub> ) AFTER 10 AND 30 MIN, X MARKING THE PEAKS USED FOR INTEGRATION. (B) TIME-DEPENDENT COMPOSITION DURING THE CATALYSIS BASED ON <sup>1</sup> H-NMR DATA. ....                          | S24 |
| <b>FIG. S14.</b> | (A) <sup>1</sup> H-NMR SPECTRA OF A STANDARD CATALYSIS (0.04 MMOL DIPHENYL SULFIDE, 0.06 MMOL H <sub>2</sub> O <sub>2</sub> (60 %), 0.85 MG WO <sub>3-x</sub> NANORODS IN 0.6 ML OF METHANOL-D <sub>4</sub> ) AFTER 10 AND 30 MIN, X MARKING THE PEAKS USED FOR INTEGRATION. (B) TIME-DEPENDENT COMPOSITION DURING THE CATALYSIS BASED ON <sup>1</sup> H-NMR DATA. ....                               | S26 |
| <b>FIG. S15.</b> | (A) <sup>1</sup> H-NMR SPECTRA OF A STANDARD CATALYSIS (0.04 MMOL DIBENZYL SULFIDE, 0.06 MMOL H <sub>2</sub> O <sub>2</sub> (60 %), 0.85 MG WO <sub>3-x</sub> NANORODS IN 0.6 ML OF METHANOL-D <sub>4</sub> ) AFTER 10 AND 30 MIN, X MARKING THE PEAKS USED FOR INTEGRATION. (B) TIME-DEPENDENT COMPOSITION DURING THE CATALYSIS BASED ON <sup>1</sup> H-NMR DATA. ....                               | S28 |
| <b>FIG. S16.</b> | (A) <sup>1</sup> H-NMR SPECTRA OF A STANDARD CATALYSIS (0.04 MMOL 4-NITROPHENYL METHYL SULFIDE, 0.06 MMOL H <sub>2</sub> O <sub>2</sub> (60 %), 0.85 MG WO <sub>3-x</sub> NANORODS IN 0.6 ML OF METHANOL-D <sub>4</sub> ) AFTER 10 AND 30 MIN, X MARKING THE PEAKS USED FOR INTEGRATION. (B) TIME-DEPENDENT COMPOSITION DURING THE CATALYSIS BASED ON <sup>1</sup> H-NMR DATA. ....                   | S30 |
| <b>FIG. S17.</b> | (A) <sup>1</sup> H-NMR SPECTRA OF A STANDARD CATALYSIS (0.04 MMOL 4-METHOXYPHENYL METHYL SULFIDE, 0.06 MMOL H <sub>2</sub> O <sub>2</sub> (60 %), 0.85 MG WO <sub>3-x</sub> NANORODS IN 0.6 ML OF METHANOL-D <sub>4</sub> ) AFTER 10 AND 30 MIN, X MARKING THE PEAKS USED FOR INTEGRATION. (B) TIME-DEPENDENT COMPOSITION DURING THE CATALYSIS BASED ON <sup>1</sup> H-NMR DATA. ....                 | S32 |

- FIG. S18.** (A)  $^1\text{H-NMR}$  SPECTRA OF A STANDARD CATALYSIS (0.04 MMOL 4-AMINOPHENYL METHYL SULFIDE, 0.06 MMOL  $\text{H}_2\text{O}_2$  (60 %), 0.85 MG  $\text{WO}_{3-x}$  NANORODS IN 0.6 ML OF METHANOL- $\text{D}_4$ ) AFTER 10 AND 30 MIN, X MARKING THE PEAKS USED FOR INTEGRATION. (B) TIME-DEPENDENT COMPOSITION DURING THE CATALYSIS BASED ON  $^1\text{H-NMR}$  DATA. ....S34
- FIG. S19.** (A)  $^1\text{H-NMR}$  SPECTRA OF A CATALYSIS USING SULFOXIDES (0.04 MMOL DMSO, 0.06 MMOL  $\text{H}_2\text{O}_2$  (60 %), 0.85 MG  $\text{WO}_{3-x}$  NANORODS IN 0.6 ML OF METHANOL- $\text{D}_4$ ) AFTER 10 AND 30 MIN, X MARKING THE PEAKS USED FOR INTEGRATION. (B) TIME-DEPENDENT COMPOSITION DURING THE CATALYSIS BASED ON  $^1\text{H-NMR}$  DATA. ....S36
- FIG. S20.** (A)  $^1\text{H-NMR}$  SPECTRA OF A STANDARD CATALYSIS (0.04 MMOL DIBENZOTHIOPHEN, 0.06 MMOL  $\text{H}_2\text{O}_2$  (60 %), 0.85 MG  $\text{WO}_{3-x}$  NANORODS IN 0.6 ML OF METHANOL- $\text{D}_4$ ) AFTER 10 AND 30 MIN. (B)  $^1\text{H-NMR}$  SPECTRA OF AN *EX SITU* CATALYSIS (0.04 MMOL DIBENZOTHIOPHEN, 0.06 MMOL  $\text{H}_2\text{O}_2$  (60 %), 8.5 MG  $\text{WO}_{3-x}$  NANORODS IN 1 ML OF METHANOL- $\text{D}_4$ ) AFTER 10 AND 30 MIN. X MARKING THE PEAKS USED FOR INTEGRATION. ....S38

**Materials.** All chemicals were used as received without further purification. Choline chloride ( $\geq 98\%$ ) and cerium(III) nitrate hexahydrate (99.5 %, REacton) was purchased from Alfa Aesar, urea (99.5 %, analytical grade) was bought from Acros organics.

**Tungsten oxide nanoparticle synthesis.**  $\text{WO}_{3-x}$  nanorods (conditions **NR-1**) and ammonium tungsten bronze ( $(\text{NH}_4)_{\sim 0.2}\text{WO}_3$ ) nanoparticles (conditions **ATB-15c**) were synthesized according to our previous publication.<sup>1</sup>

**CeO<sub>2</sub> nanoparticle synthesis.** CeO<sub>2</sub> nanoparticles were synthesized based on a synthesis of Hammond et. al.<sup>2</sup> Choline chloride and urea were mixed in molar ratio of 2:1 and heated to 80 °C for 14 h to gain the deep eutectic solvent reline. The reline was dried at 70 °C under reduced pressure for 6 h.  $\text{Ce}(\text{NO}_3)_3 \cdot 6\text{H}_2\text{O}$  (750 mg; 1.7 mmol) was dissolved in reline (40 mL), transferred into a stainless steel autoclave (total volume: 50 mL) and heated to 100 °C for 10 h. The highly viscous gel-like reaction mixture was poured into Milli-Q-water (140 mL). The purple product was separated from the suspension by centrifugation (6000-9000 rpm, 10 min), washed three times with Milli-Q-water and three times with ethanol and dried at 80 °C for 14 h. The nanoparticles were calcined at 300 °C for 5 h before being used in catalytic experiments.

**TiO<sub>2</sub> nanoparticles.** Anatase TiO<sub>2</sub> nanoparticles were synthesized according our previous study,<sup>3</sup> based on a synthesis published by Dinh et. al.<sup>4</sup>

**General Considerations.** We attribute slight variations for the different standard *in situ* reactions mainly to residual moisture in the different methanol-d<sub>4</sub> batches, water adsorbed to the particles from air, as well as small weighing/pipetting errors.

**Table S1.** Product composition with additional water to standard *in situ* experiment (0.85 mg WO<sub>3-x</sub> nanorods, 0.04 mmol thioanisole, 0.06 mmol H<sub>2</sub>O<sub>2</sub> (60%) in 0.6 ml methanol-d<sub>4</sub>).

| Addition of water / $\mu\text{l}$ | Ratio sulfide:sulfoxide:sulfone<br>(10 min) | Ratio sulfide:sulfoxide:sulfone<br>(30 min) |
|-----------------------------------|---------------------------------------------|---------------------------------------------|
| 0                                 | 39:60:1                                     | 8:91:2                                      |
| 2.34 <sup>a</sup>                 | 50:50:0                                     | 14:85:1                                     |
| 2.34 <sup>b</sup>                 | 48:52:0                                     | 12:87:1                                     |
| 10 <sup>a</sup>                   | 73:26:1                                     | 36:62:2                                     |
| 10 <sup>b</sup>                   | 75:25:0                                     | 39:61:0                                     |
| 50 <sup>a,c</sup>                 | 92:8:0                                      | 72:28:0                                     |
| 50 <sup>b,c</sup>                 | 92:8:0                                      | 74:26:0                                     |
| 200 <sup>a,c</sup>                | 92:7:1                                      | 79:21:0                                     |
| 200 <sup>b,c</sup>                | 93:7:0                                      | 79:21:0                                     |

a. addition of H<sub>2</sub>O. b. addition of D<sub>2</sub>O. c. total volume fixed to 600  $\mu\text{l}$ .

$$r = a * e^{-b * V} + c$$

r = conversion / %

V= added volume of H<sub>2</sub>O / D<sub>2</sub>O

**Table S2.** Fit parameters for water curves according to the equation above.

| Curve                   | a      | b     | c      |
|-------------------------|--------|-------|--------|
| D <sub>2</sub> O 10 min | 55.059 | 0.108 | 7.256  |
| H <sub>2</sub> O 10 min | 53.252 | 0.100 | 7.775  |
| D <sub>2</sub> O 30 min | 72.944 | 0.057 | 21.365 |
| H <sub>2</sub> O 30 min | 71.523 | 0.051 | 21.457 |

**Table S3.** Product composition after annealing at different temperatures for standard *in situ* experiment (0.85 mg WO<sub>3-x</sub> nanorods, 0.04 mmol thioanisole, 0.06 mmol H<sub>2</sub>O<sub>2</sub> (60%) in 0.6 ml methanol-d<sub>4</sub>).

| Annealing temperature / °C | Crystallographic phase       | Ratio sulfide:sulfoxide:sulfone (10 min) | Ratio sulfide:sulfoxide:sulfone (30 min) |
|----------------------------|------------------------------|------------------------------------------|------------------------------------------|
| 70 <sup>a</sup>            | WO <sub>3-x</sub>            | 96:4:0                                   | 90:10:0                                  |
| 200                        | WO <sub>3-x</sub>            | 92:8:0                                   | 88:12:0                                  |
| 250                        | WO <sub>3-x</sub>            | 51:49:0                                  | 17:82:1                                  |
| 300                        | WO <sub>3-x</sub>            | 39:60:1                                  | 8:90:2                                   |
| 350                        | WO <sub>3-x</sub>            | 70:30:0                                  | 41:58:0                                  |
| 400                        | WO <sub>3-x</sub>            | 77:23:0                                  | 55:45:0                                  |
| 500                        | WO <sub>3</sub> (monoclinic) | 97:3:0                                   | 97:3:0                                   |

a. Particles additionally dried @ 40 °C under reduced pressure ( $\sim 1 \cdot 10^{-2}$  mbar), 1.7 mg particles in 0.6 ml methanol-d<sub>4</sub>, 0.2 mmol thioanisole, 0.3 mmol H<sub>2</sub>O<sub>2</sub> (60 %).

**Table S4.** BET surface area and  $\zeta$  – potential of nanoparticles used for sulfide oxidation.

| catalyst                                       | Specific surface area / $\text{m}^2\text{g}^{-1}$ | $\zeta$ – potential / mV |
|------------------------------------------------|---------------------------------------------------|--------------------------|
| $\text{WO}_{3-x}$ nanorods                     | 47.0                                              | -39.7                    |
| $(\text{NH}_4)_{0.2}\text{WO}_3$ nanoparticles | 22.8                                              | -36.8                    |
| $\text{WO}_3$ reference (monoclinic)           | 2.7                                               | -39.3                    |
| $\text{CeO}_2$ nanoparticles                   | 133.9                                             | 23.8                     |
| $\text{TiO}_2$ nanoparticles                   | 151.7                                             | -9.1                     |
| $\text{TiO}_2$ P25                             | 49.7                                              | 17.7                     |



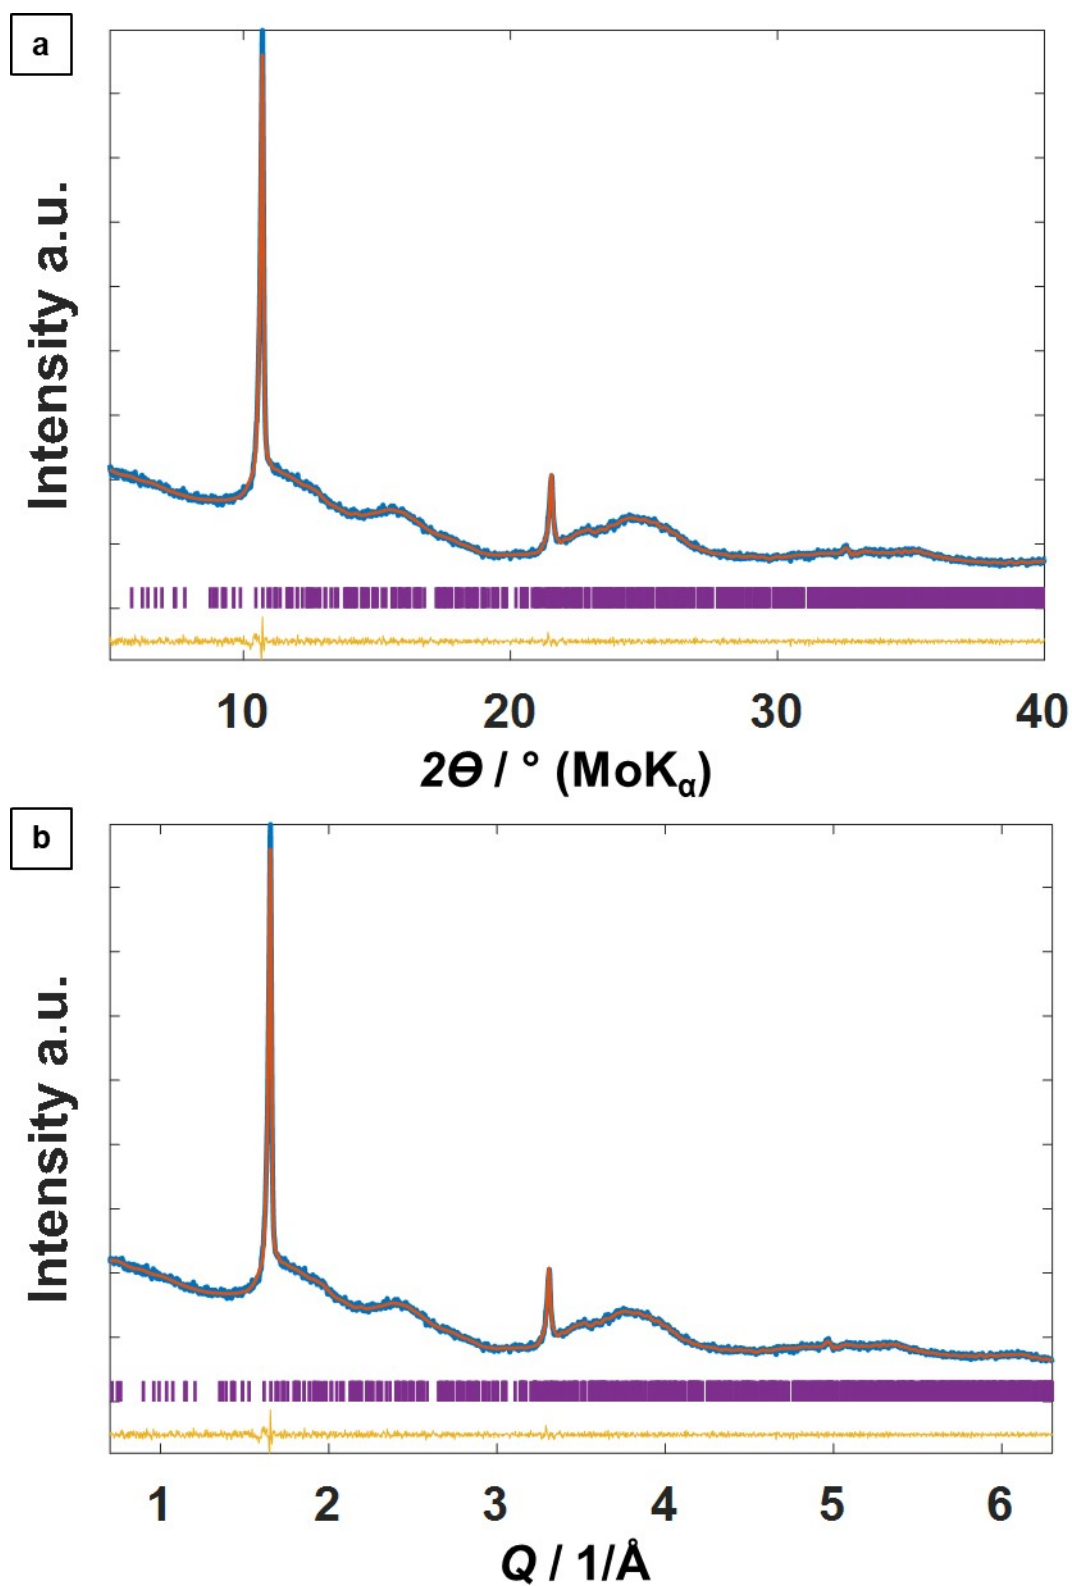

**Fig. S1.** Pawley refinements of  $\text{WO}_{3-x}$  NRs annealed at  $300^\circ\text{C}$  using space group  $P2/m$  and a quadratic form to compensate the anisotropy.<sup>1</sup> Refined parameters are:  $R_{\text{wp}}$ : 2.23, GOF: 1.08, crystal size ( $a*b*c$ ):  $4.1*72.6*4.3$  nm. Lattice parameters:  $a=18.196$  Å,  $b=3.794$  Å and  $c=14.000$  Å.

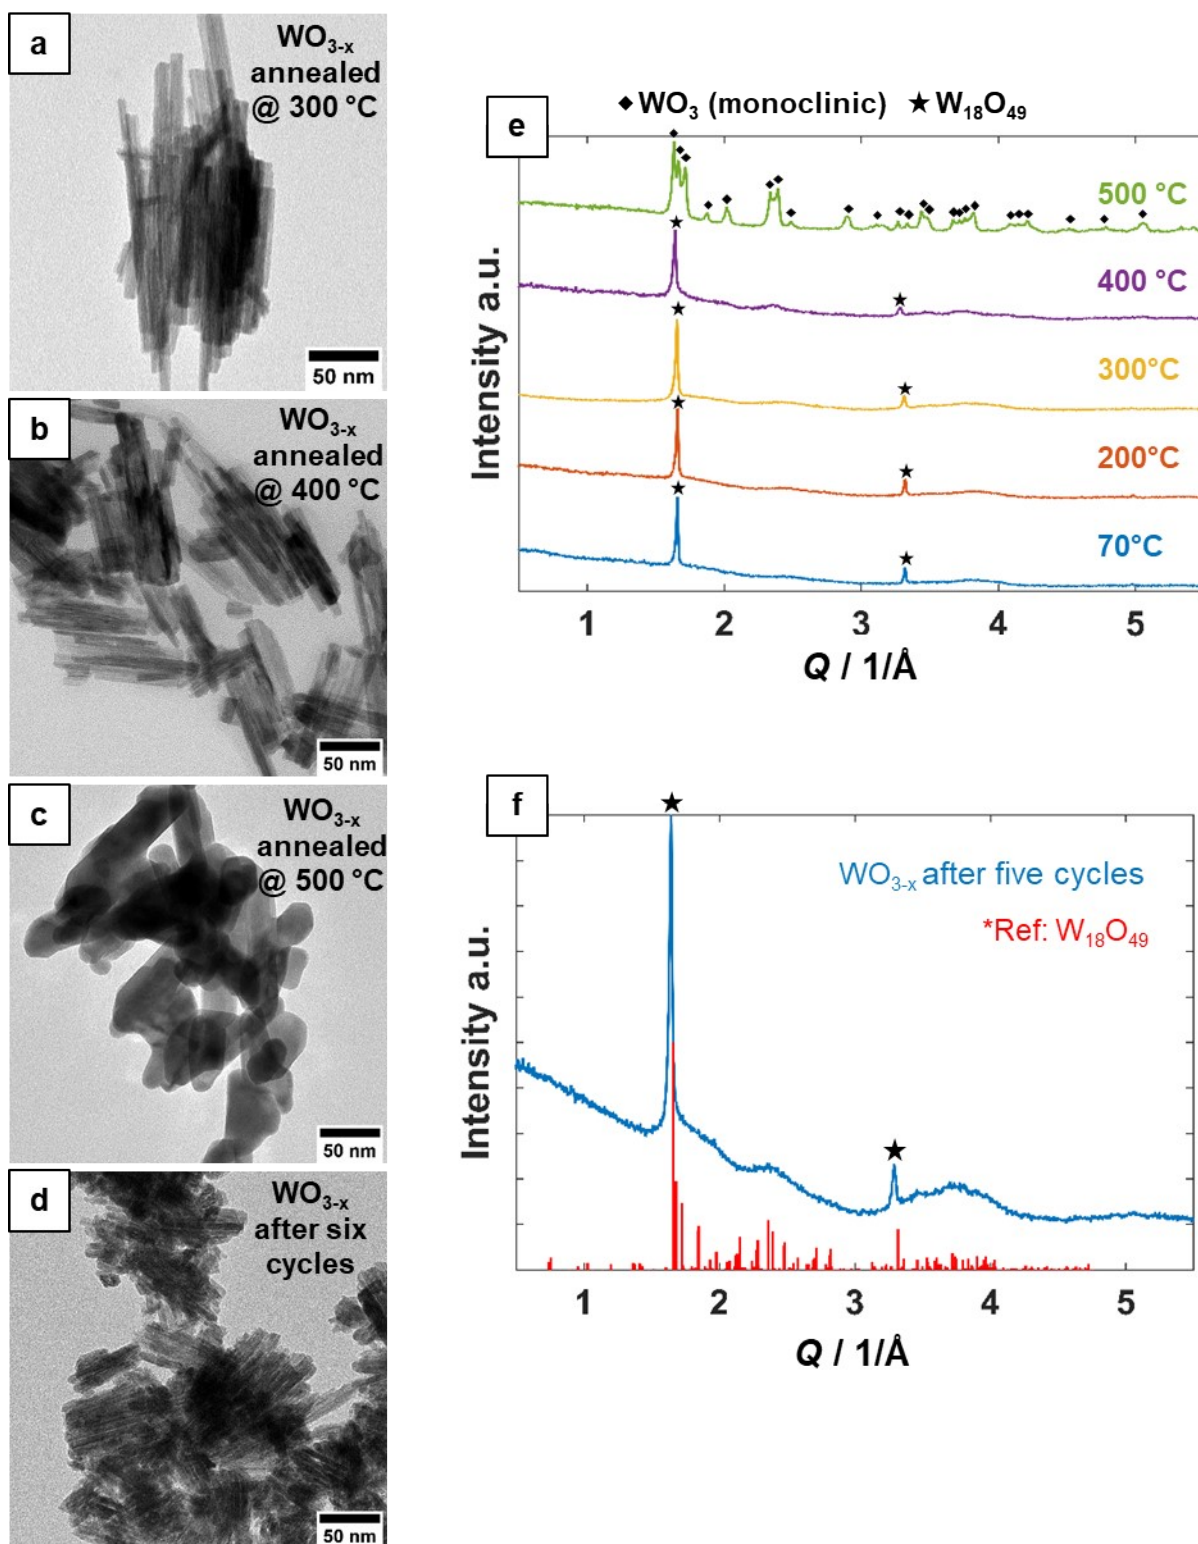

**Fig. S2.** TEM images of  $\text{WO}_{3-x}$  nanorods annealed at (a) 300 °C, (b) 400 °C, (c) 500 °C and (d) after six reaction cycles. (e) P-XRD patterns of annealed  $\text{WO}_{3-x}$  nanorods up to 500 °C and (f) after five reaction cycles. References:  $\text{W}_{18}\text{O}_{49}$  ( $\text{WO}_{2.72}$ , COD, Entry No.: 96-152-8167),  $\text{WO}_3$  (monoclinic, COD, Entry No.: 96-152-8916).

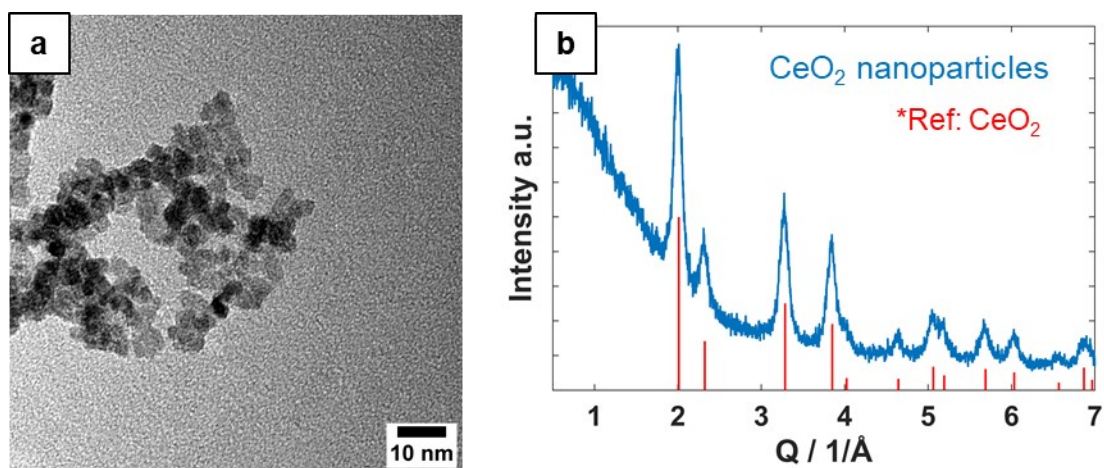

**Fig. S3.** (a) TEM image and (b) P-XRD pattern of CeO<sub>2</sub> nanoparticles. Reference: Cerianite (CeO<sub>2</sub>), COD, Entry No.: 96-900-9009).

## **<sup>1</sup>H-NMR characterization**

### **Thioanisole (methyl phenyl sulfide)**

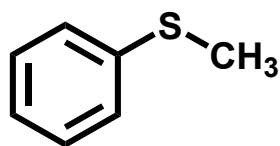

**<sup>1</sup>H-NMR** (400 MHz, d<sub>4</sub>-MeOD) δ (ppm): 7.29-7.26 (m, 4H), 7.15-7.12 (m, 1H), 2.48 (s, 3H).

Published elsewhere<sup>5</sup>: **<sup>1</sup>H-NMR** (400 MHz, CDCl<sub>3</sub>) δ (ppm): 7.32-7.20 (m, 4H), 7.17-7.07 (m, 1H), 2.47 (s, 3H).

### **Methyl phenyl sulfoxide**

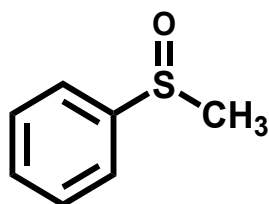

**<sup>1</sup>H-NMR** (400 MHz, d<sub>4</sub>-MeOD) δ (ppm): 7.74-7.61 (m, 5H), 2.81 (s, 3H).

Published elsewhere<sup>6</sup>: **<sup>1</sup>H-NMR** (400 MHz, CDCl<sub>3</sub>) δ (ppm): 7.62-7.60 (m, 2H), 7.51-7.44 (m, 3H), 2.68 (s, 3H).

### **Methyl phenyl sulfone**

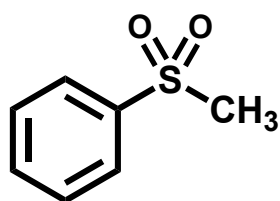

**<sup>1</sup>H-NMR** (400 MHz, d<sub>4</sub>-MeOD) δ (ppm): 7.99-7.95 (m, 2H), ~7.66-7.54 (m, 3H)<sup>a</sup>, 3.13 (s, 3H).

Published elsewhere<sup>6</sup>: **<sup>1</sup>H-NMR** (400 MHz, CDCl<sub>3</sub>) δ (ppm): 7.92 (d, *J* = 7.5 Hz, 2H), 7.66-7.54 (m, 3H), 3.04 (s, 3H).

a. Signals of the aromatic protons partially overlapping with those of MP-sulfoxide. MP-sulfone content calculated as 2.5 times the integral of the signal at 7.99-7.95 ppm. The MP-sulfoxide content was calculated as the integral of the signal at 7.62-7.44 ppm minus the 1.5 times the integral of the signal at 7.99-7.95 ppm.

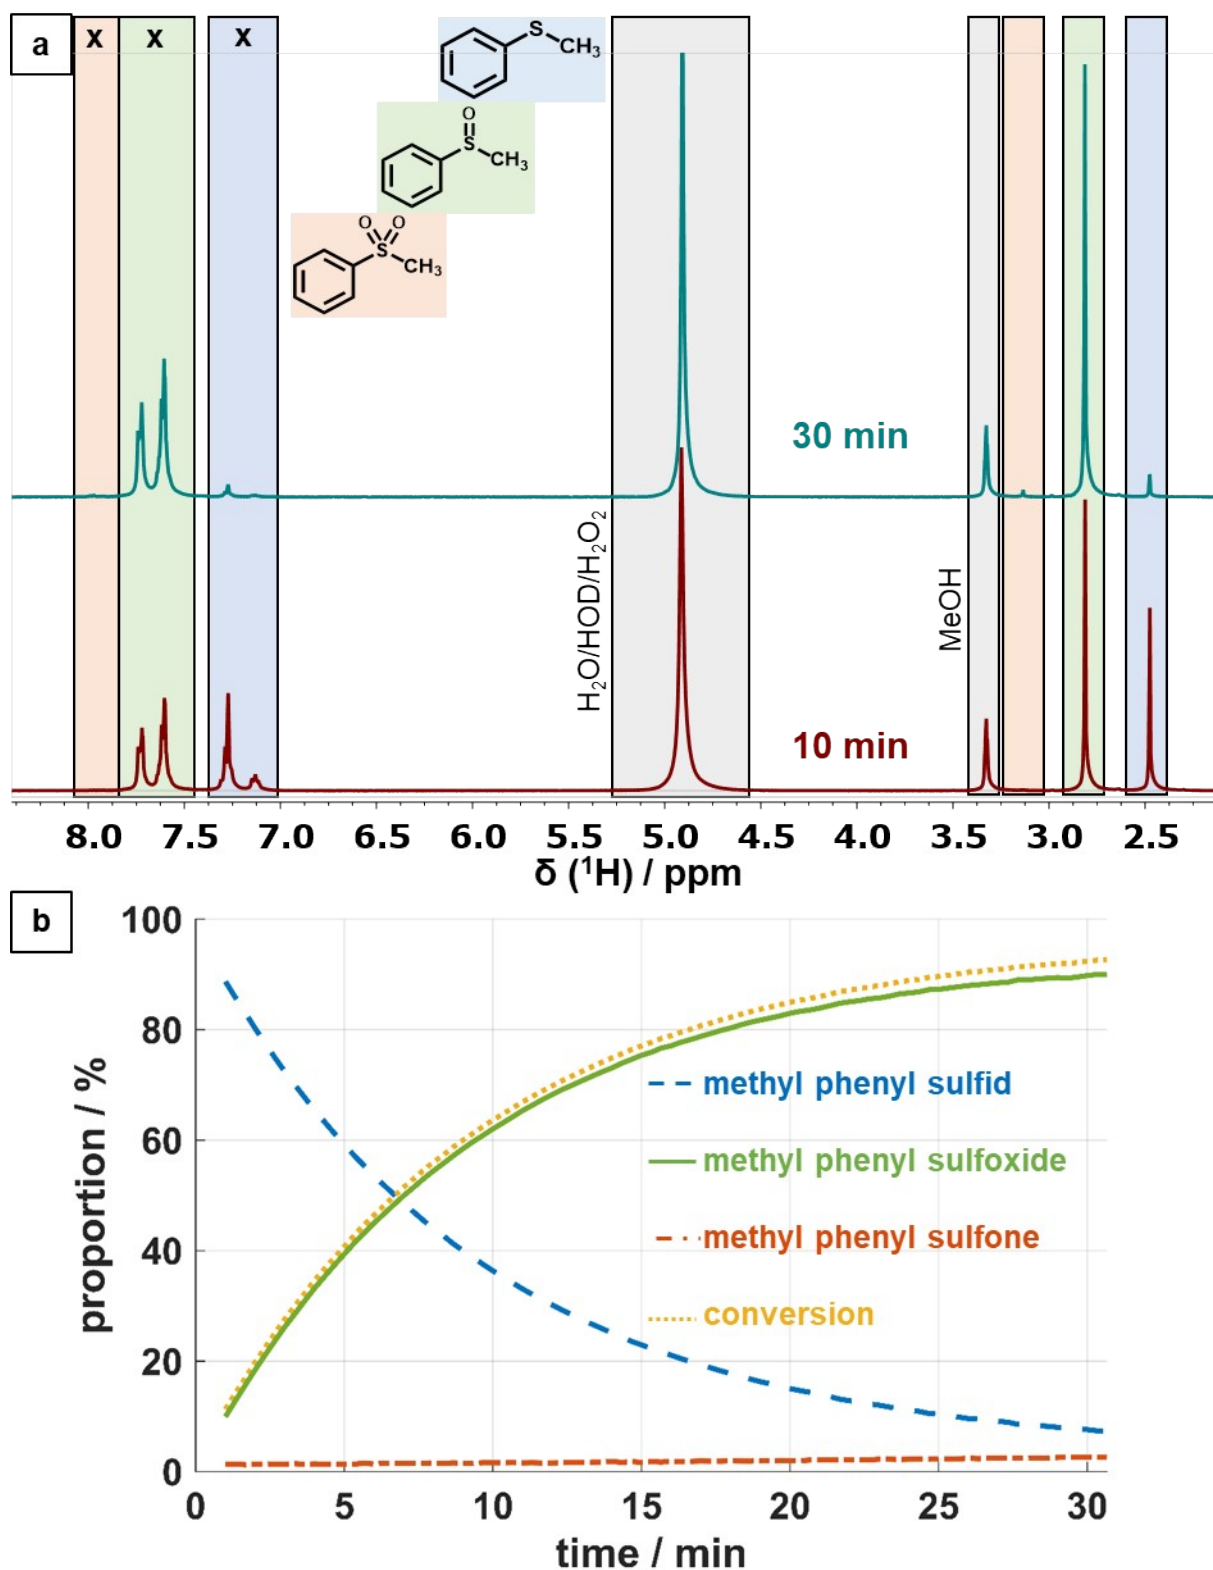

**Fig. S4.** (a)  $^1\text{H-NMR}$  spectra of a standard catalysis (0.04 mmol thioanisole, 0.06 mmol  $\text{H}_2\text{O}_2$  (60 %), 0.85 mg  $\text{WO}_{3-x}$  nanorods in 0.6 mL of methanol- $d_4$ ) after 10 and 30 min, x marking the peaks used for integration. (b) Time dependent composition during the catalysis based on  $^1\text{H-NMR}$  data.

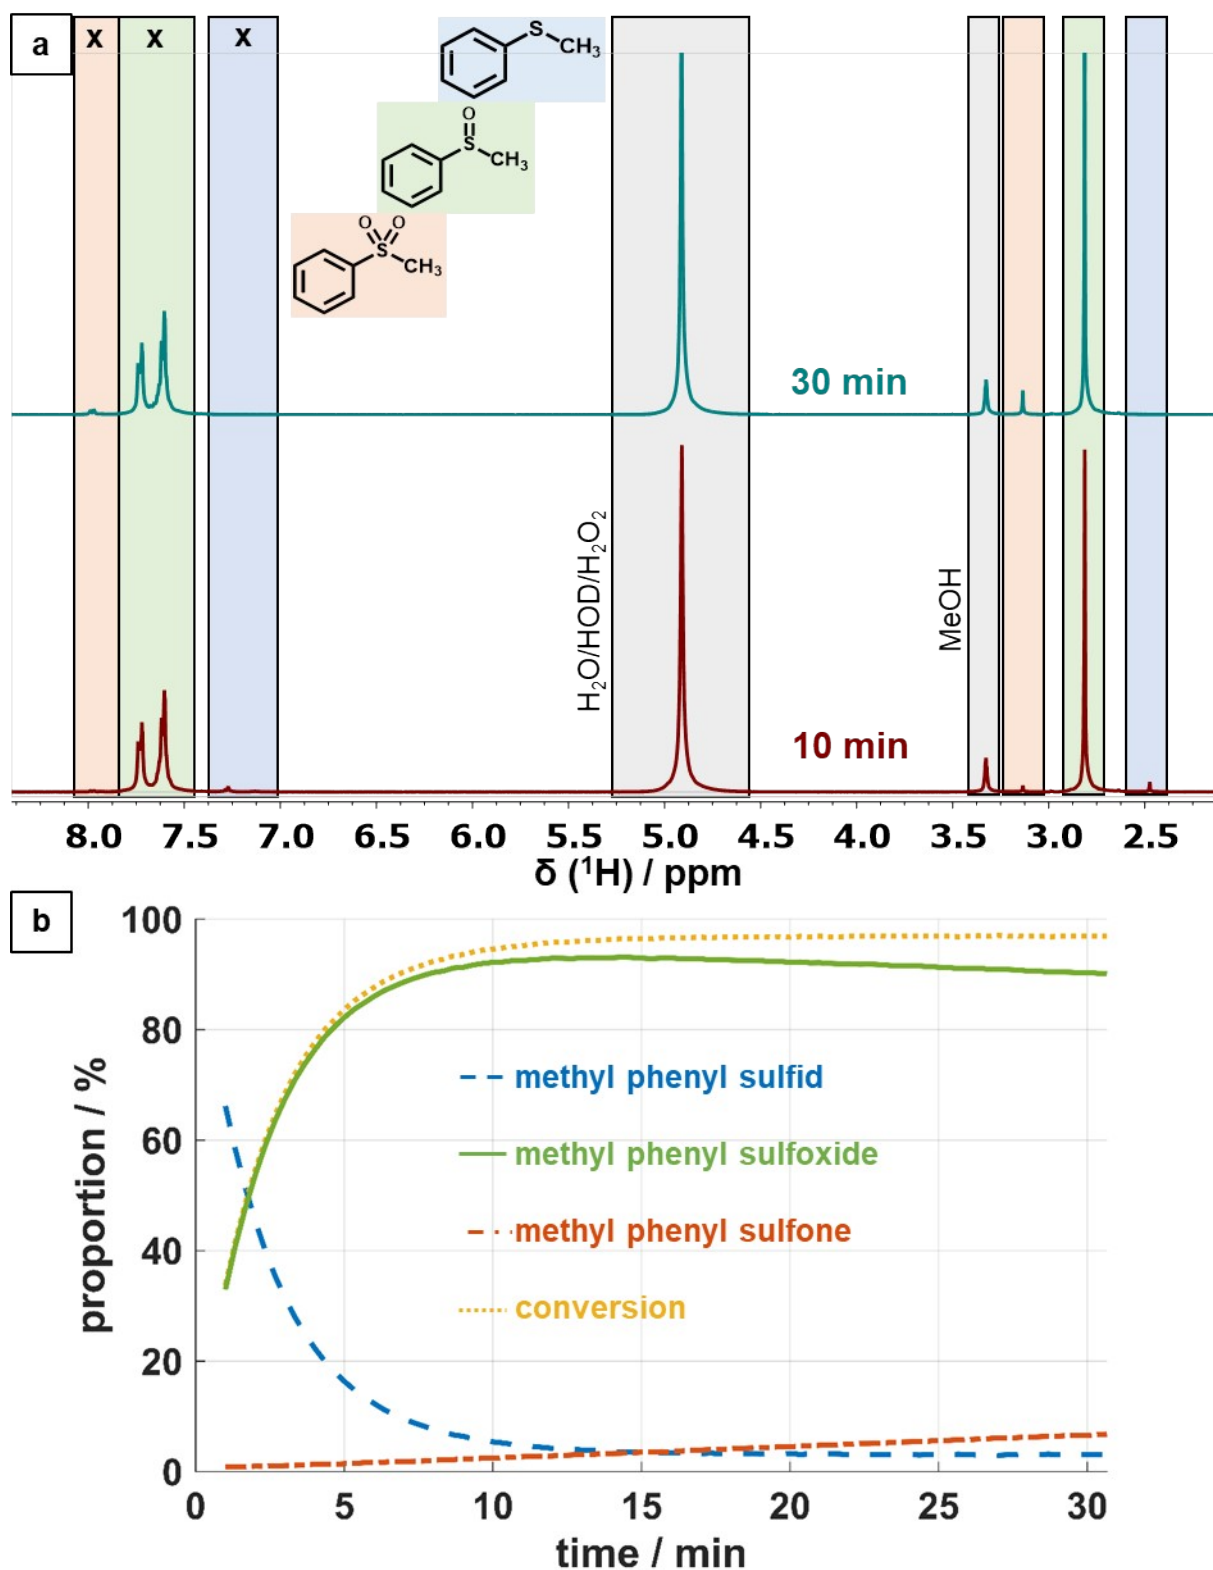

**Fig. S5.** (a)  $^1\text{H}$ -NMR spectra of a catalysis with double amounts (0.08 mmol thioanisole, 0.12 mmol  $\text{H}_2\text{O}_2$  (60%), 1.7 mg  $\text{WO}_{3-x}$  nanorods in 0.6 mL of methanol- $d_4$ ) after 10 and 30 min, x marking the peaks used for integration. (b) Time dependent composition during the catalysis based on  $^1\text{H}$ -NMR data.

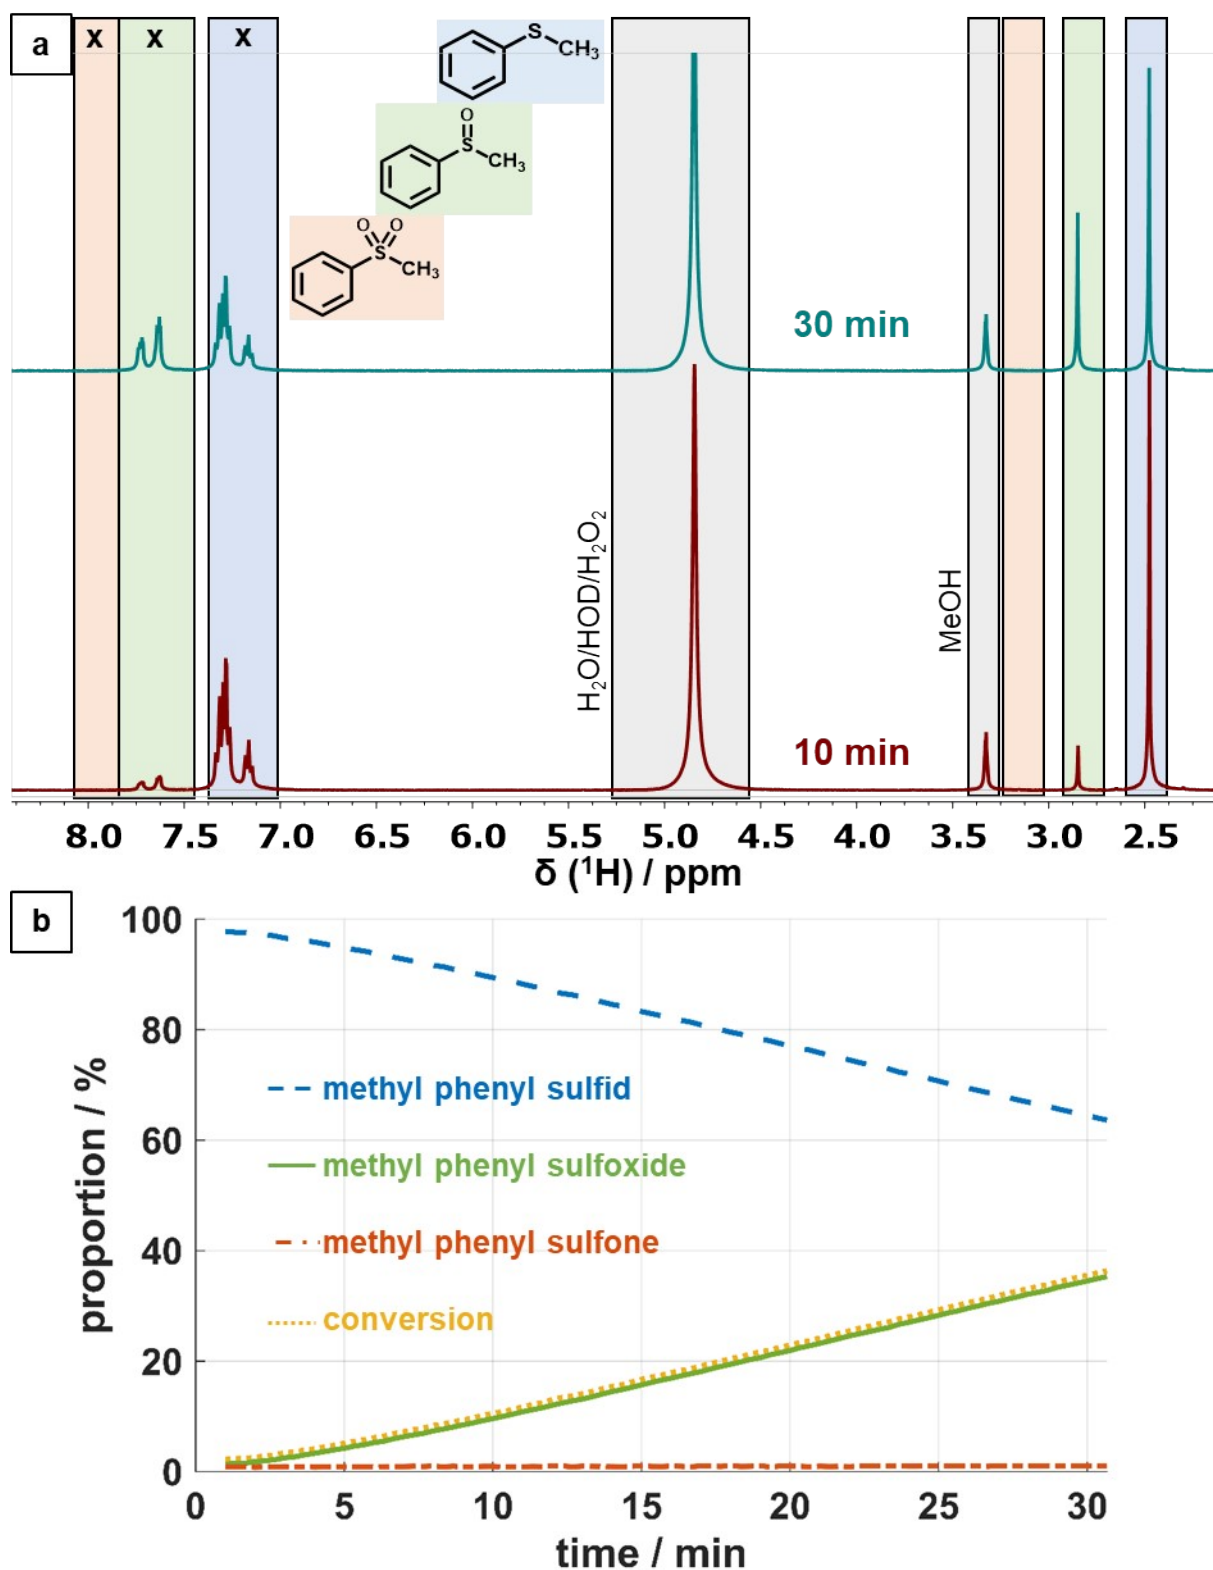

**Fig. S6.** (a)  $^1\text{H-NMR}$  spectra of a catalysis with water influence (0.04 mmol thioanisole, 0.06 mmol  $\text{H}_2\text{O}_2$  (60 %), 0.85 mg  $\text{WO}_{3-x}$  nanorods in 0.4 mL of methanol- $\text{d}_4$  and 0.2 ml  $\text{D}_2\text{O}$ ) after 10 and 30 min, x marking the peaks used for integration. (b) Time-dependent composition during the catalysis based on  $^1\text{H-NMR}$  data.

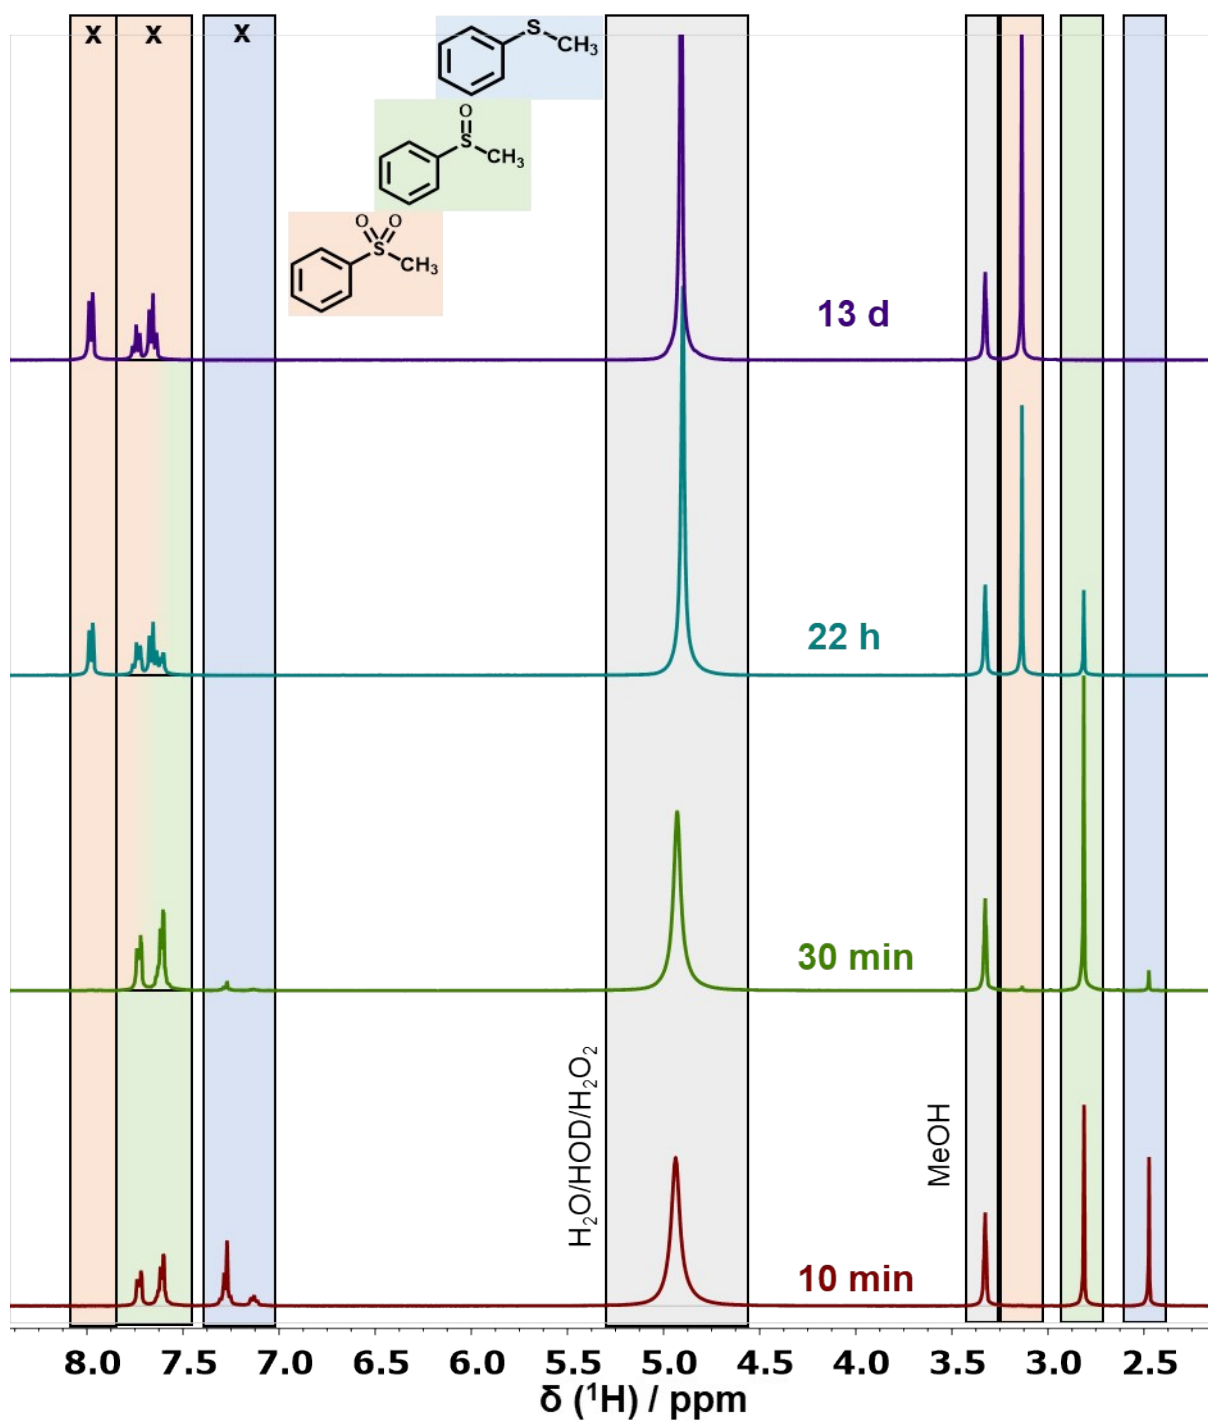

**Fig. S7.** <sup>1</sup>H-NMR spectra of a standard catalysis (0.04 mmol thioanisole, 0.12 mmol H<sub>2</sub>O<sub>2</sub> (60 %), 0.85 mg WO<sub>3-x</sub> nanorods in 0.6 mL of methanol-d<sub>4</sub>) after 10 min, 30 min, 22h and 13 d, x marking the peaks used for integration.



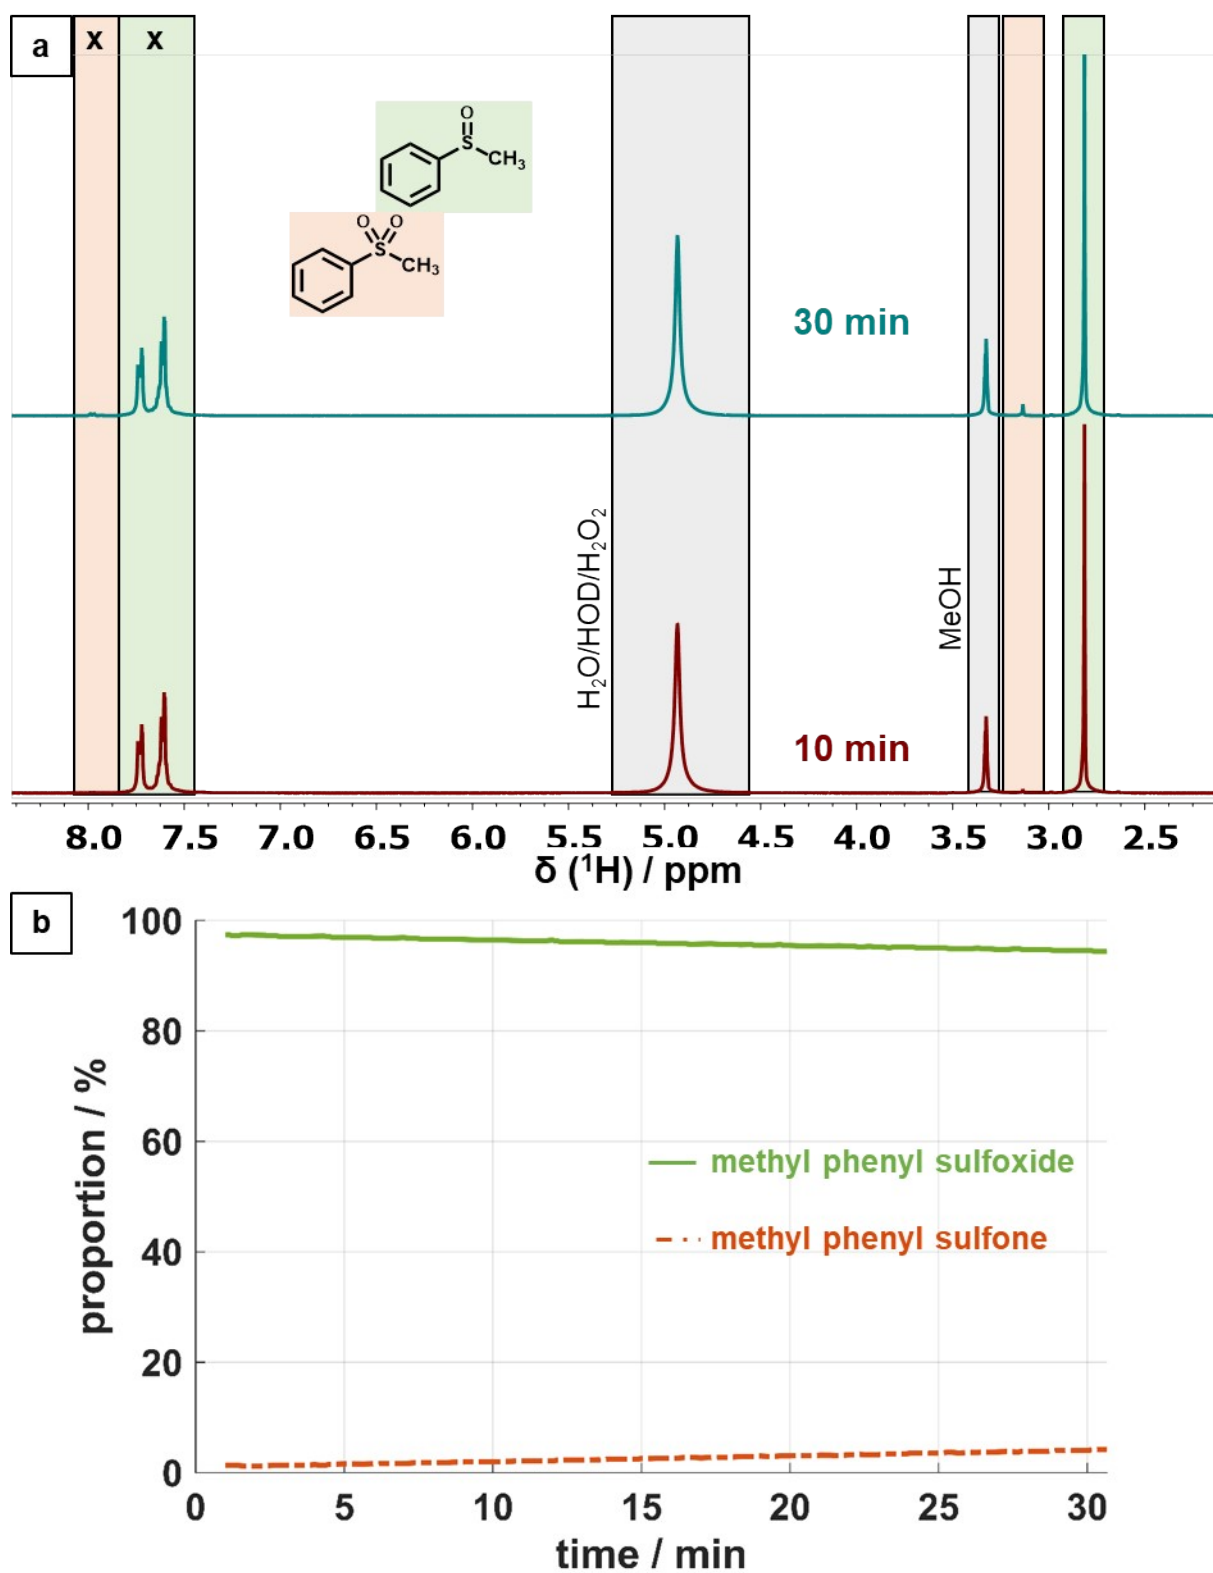

**Fig. S8.** (a)  $^1\text{H}$ -NMR spectra of an oxidation catalysis using sulfoxides (0.04 mmol MP-sulfone, 0.06 mmol  $\text{H}_2\text{O}_2$  (60%), 0.85 mg  $\text{WO}_{3-x}$  nanorods in 0.6 mL of methanol- $d_4$ ) after 10 and 30 min, x marking the peaks used for integration. (b) Time-dependent composition during the catalysis based on  $^1\text{H}$ -NMR data.

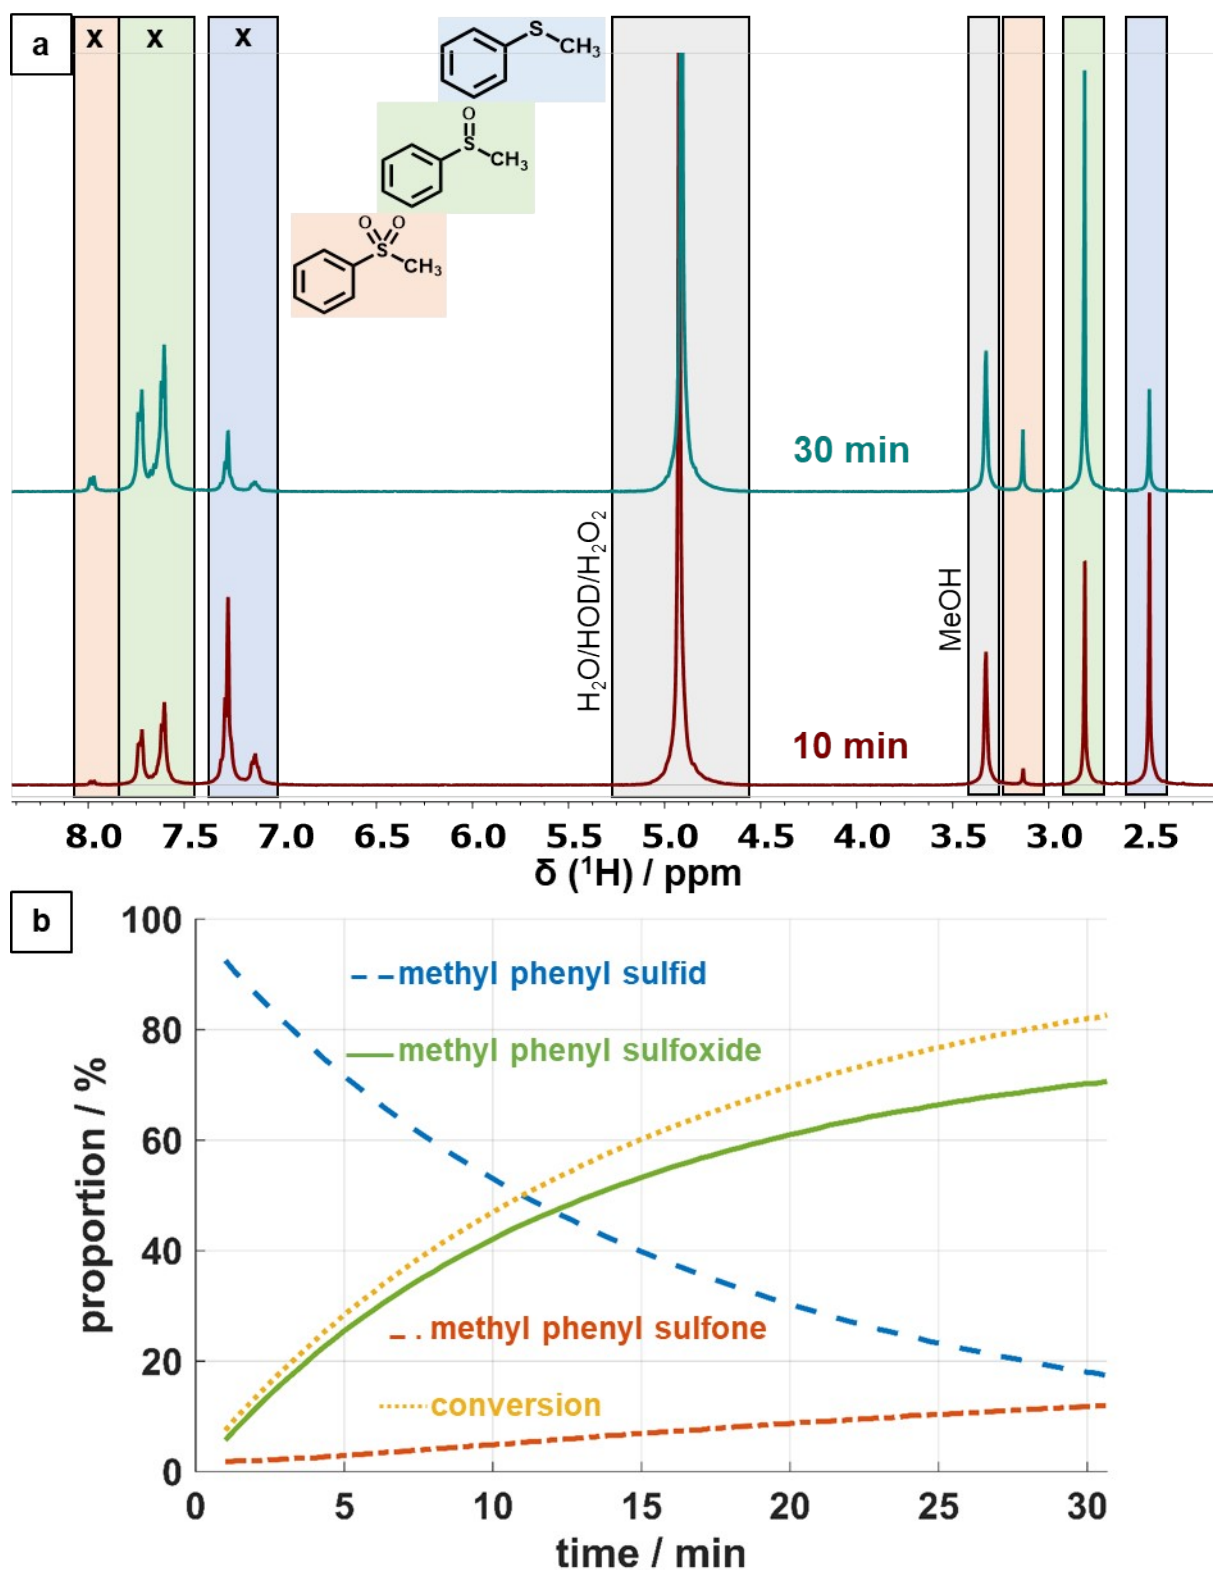

**Fig. S9.** (a)  $^1\text{H}$ -NMR spectra of a standard oxidation catalysis (0.04 mmol thioanisole, 0.06 mmol  $\text{H}_2\text{O}_2$  (60 %), 0.85 mg  $\text{Na}_2\text{WO}_4 \cdot 2\text{H}_2\text{O}$  in 0.6 mL of methanol- $d_4$ ) after 10 and 30 min, x marking the peaks used for integration. (b) Time-dependent composition during the catalysis based on  $^1\text{H}$ -NMR data.

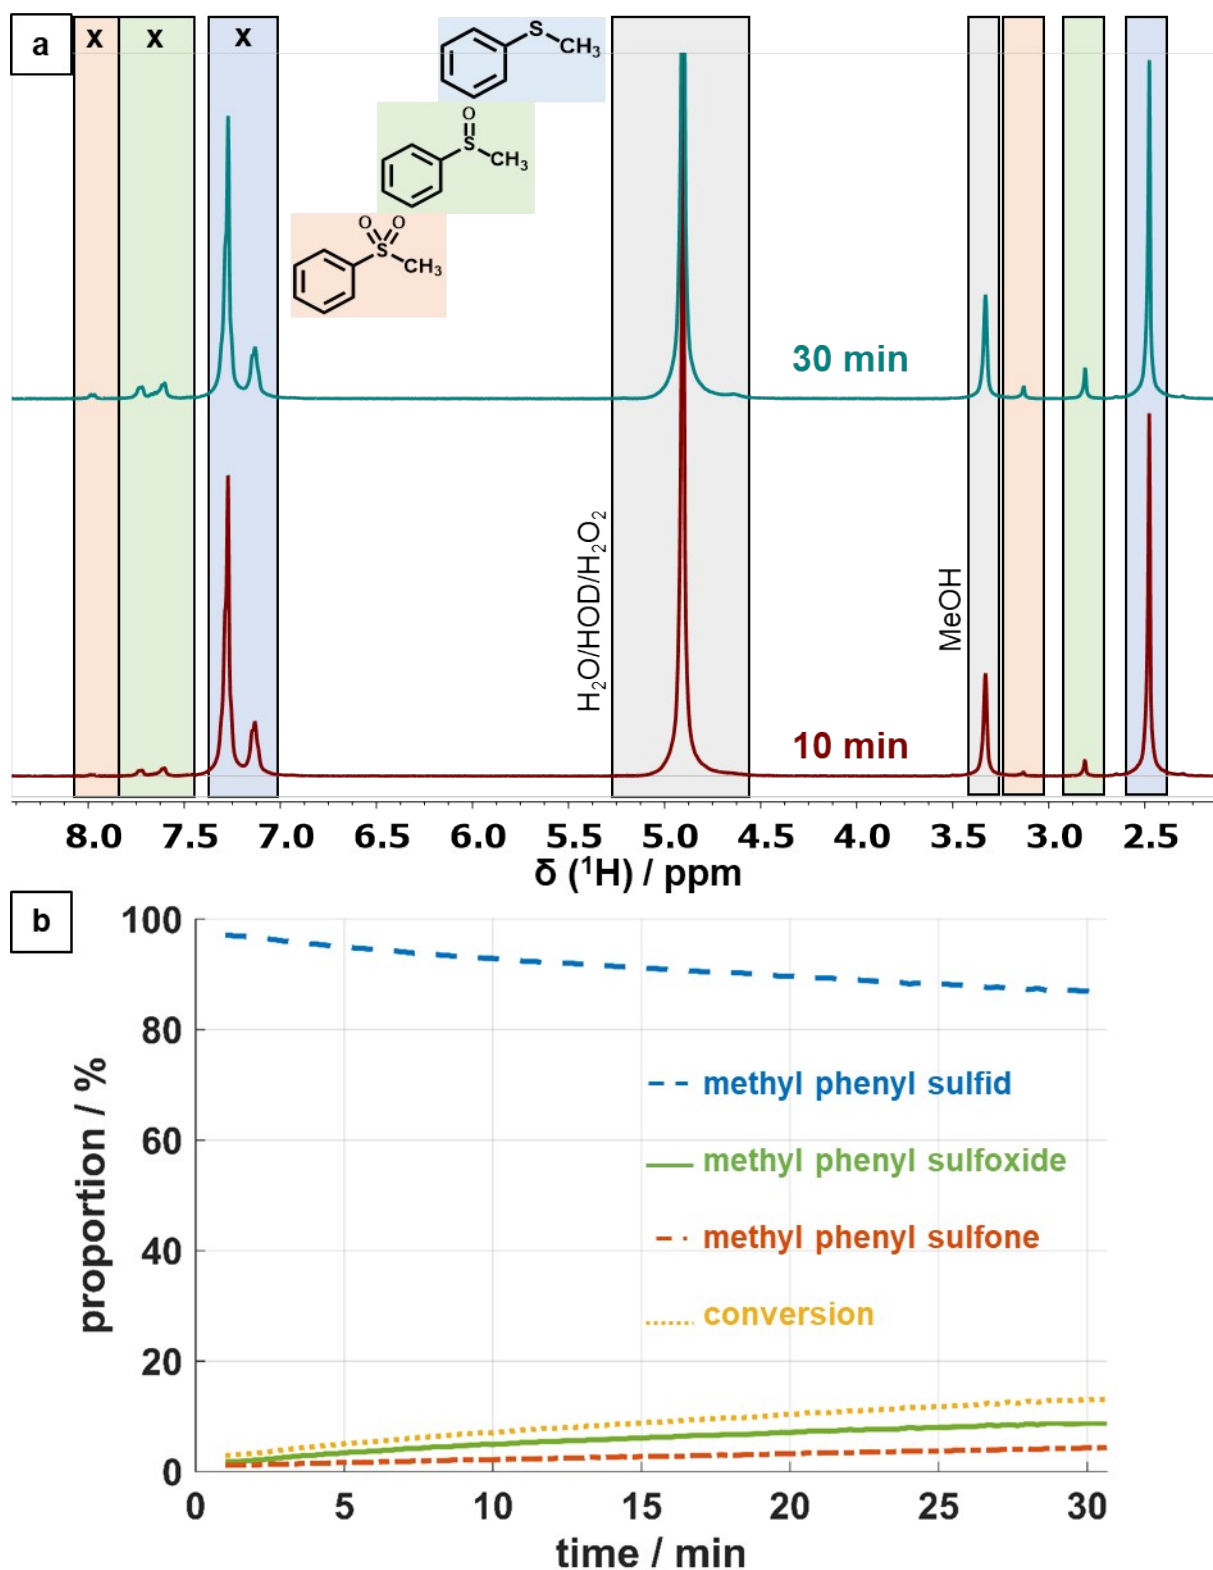

**Fig. S10.** (a)  $^1\text{H}$ -NMR spectra of a standard catalysis (0.04 mmol thioanisole, 0.06 mmol  $\text{H}_2\text{O}_2$  (60 %), 0.85 mg  $\text{CeO}_2$  nanoparticles in 0.6 mL of methanol- $\text{d}_4$ ) after 10 and 30 min, x marking the peaks used for integration. (b) Time-dependent composition during the catalysis based on  $^1\text{H}$ -NMR data.

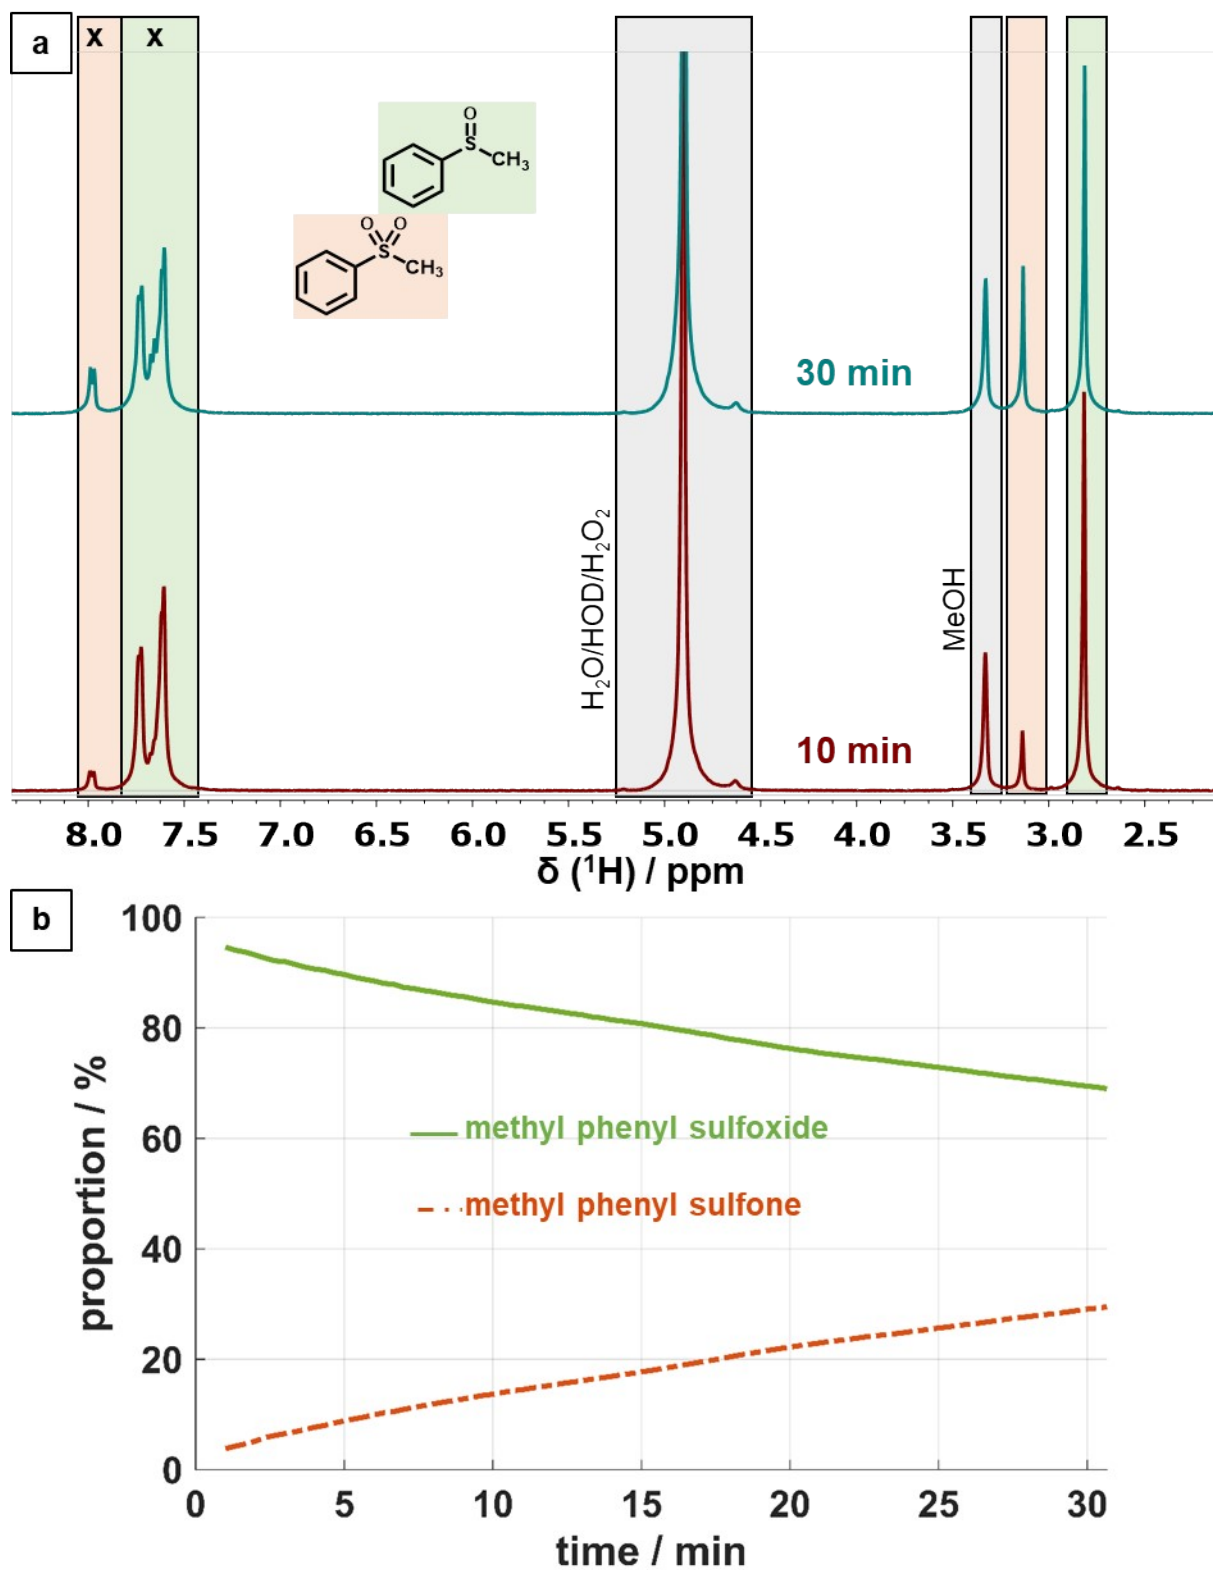

**Fig. S11.** (a)  $^1\text{H}$ -NMR spectra of a catalysis using sulfoxide (0.04 mmol MP-sulfoxide, 0.06 mmol  $\text{H}_2\text{O}_2$  (60 %), 0.85 mg  $\text{CeO}_2$  nanoparticles in 0.6 mL of methanol- $d_4$ ) after 10 and 30 min, x marking the peaks used for integration. (b) Time-dependent composition during the catalysis based on  $^1\text{H}$ -NMR data.

### Di-n-propyl sulfide

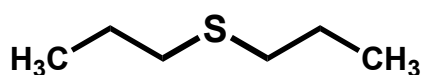

$^1\text{H-NMR}$  (400 MHz,  $d_4$ -MeOD)  $\delta$  (ppm): 2.49 (t,  $J = 7.2$  Hz, 4H), 1.66-1.56 (m, 4H), 1.00 (t,  $J = 7.4$  Hz, 6H).

Published elsewhere<sup>7</sup>:  $^1\text{H-NMR}$  (400 MHz,  $\text{CDCl}_3$ )  $\delta$  (ppm): 2.47 (t,  $J = 7.4$  Hz, 4H), 1.59 (sext,  $J = 7.4$  Hz, 4H), 0.97 (t,  $J = 7.4$  Hz, 6H).

### Di-n-propyl sulfoxide

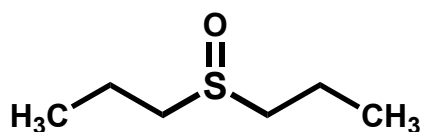

$^1\text{H-NMR}$  (400 MHz,  $d_4$ -MeOD)  $\delta$  (ppm): 2.83-2.72 (m, 4H), 1.87-1.77 (m, 4H), 1.12 (t,  $J = 7.4$  Hz, 6H).

Published elsewhere<sup>6</sup>:  $^1\text{H-NMR}$  (400 MHz,  $\text{CDCl}_3$ )  $\delta$  (ppm): 2.72-2.53 (m, 4H), 1.83-1.73 (m, 4H), 1.05 (t,  $J = 7.4$  Hz, 6H).

### Di-n-propyl sulfone

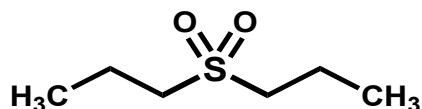

$^1\text{H-NMR}$  (400 MHz,  $d_4$ -MeOD)  $\delta$  (ppm): 3.07-3.03 (m, 4H),  $\sim$ 1.88-1.75 (m, 4H)<sup>a</sup>,  $\sim$ 1.12 (t,  $J = 7.4$  Hz, 6H)<sup>a</sup>.

Published elsewhere<sup>6</sup>:  $^1\text{H-NMR}$  (400 MHz,  $\text{CDCl}_3$ )  $\delta$  (ppm): 2.90-2.86 (m, 4H), 1.86-1.76 (m, 4H), 1.02 (t,  $J = 7.4$  Hz, 6H).

a. Signals of the protons partially overlapping with those of di-n-propyl sulfoxide.

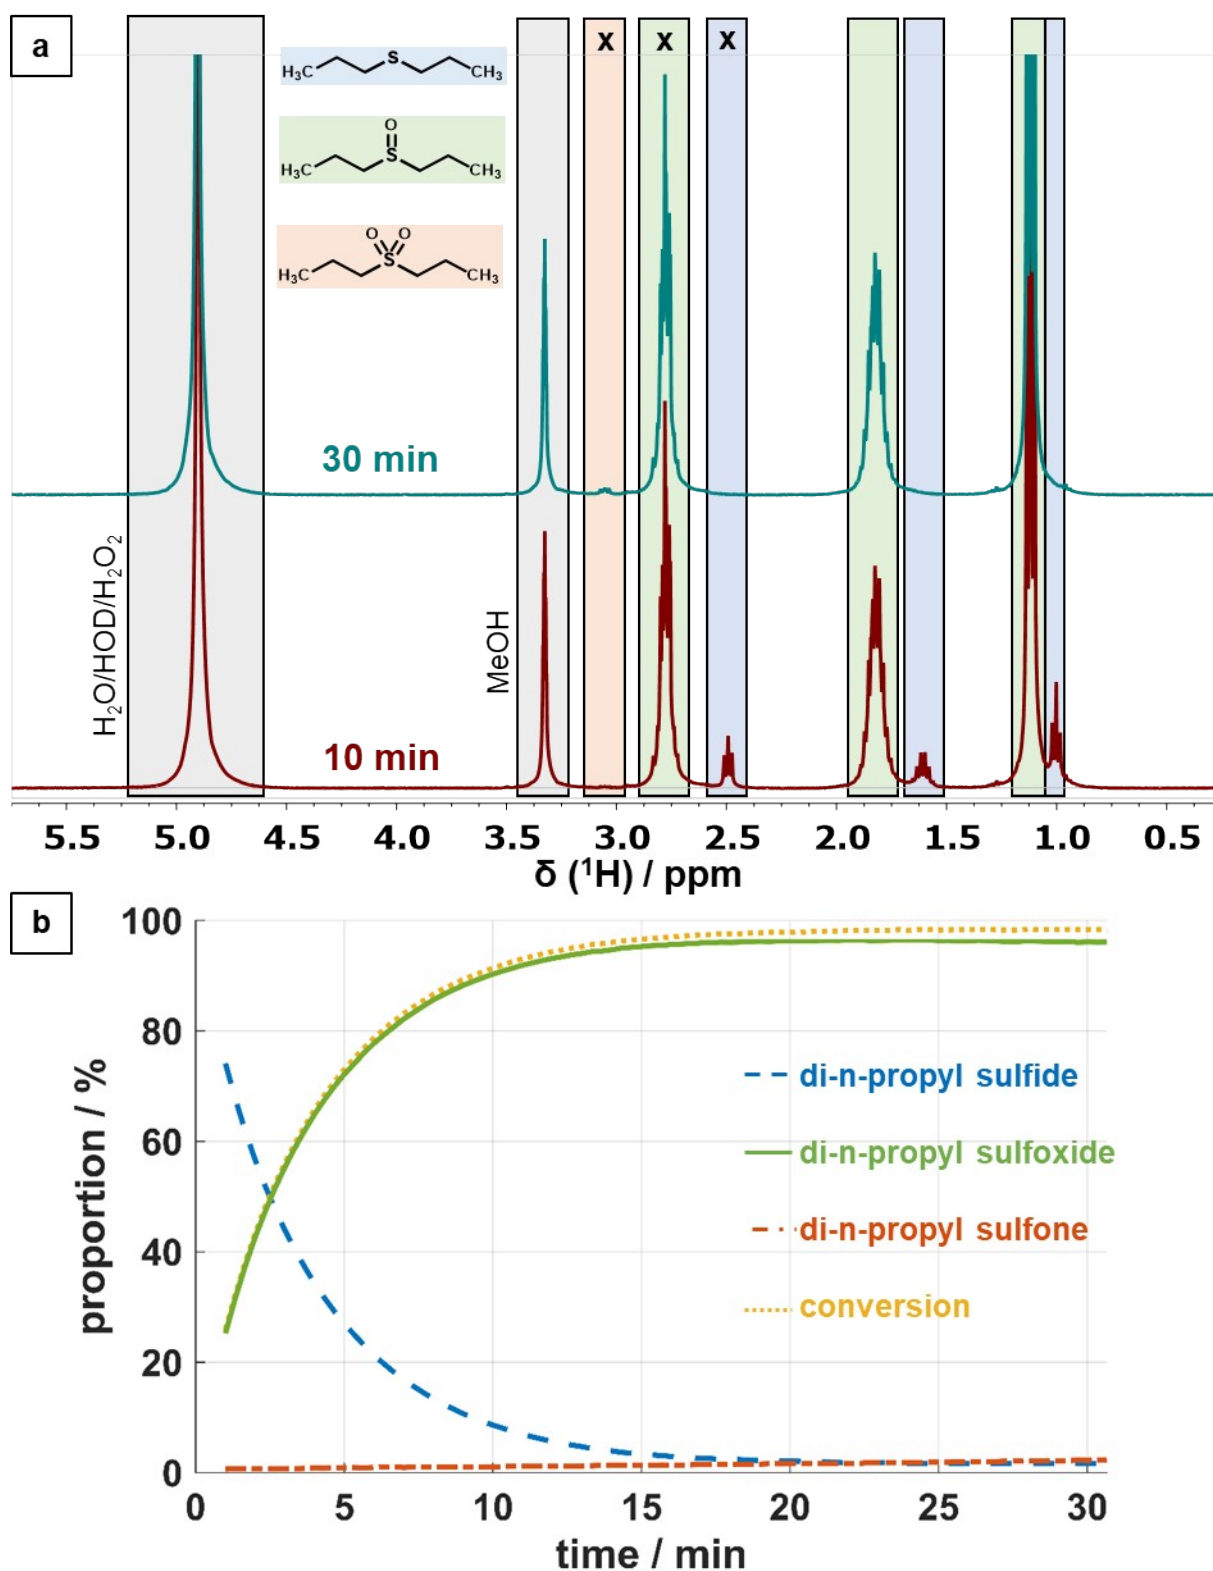

**Fig. S12.** (a) <sup>1</sup>H-NMR spectra of a standard catalysis (0.04 mmol di-n-propyl sulfide, 0.06 mmol H<sub>2</sub>O<sub>2</sub> (60%), 0.85 mg WO<sub>3-x</sub> nanorods in 0.6 mL of methanol-d<sub>4</sub>) after 10 and 30 min, x marking the peaks used for integration. (b) Time-dependent composition during the catalysis based on <sup>1</sup>H-NMR data.

### Di-tert-butyl sulfide

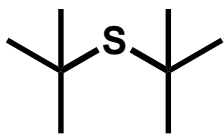

$^1\text{H-NMR}$  (400 MHz,  $d_4$ -MeOD)  $\delta$  (ppm): 1.42 (s, 18H).

Published elsewhere<sup>8</sup>:  $^1\text{H-NMR}$  (400 MHz,  $\text{CDCl}_3$ )  $\delta$  (ppm): 1.42 (s, 18H).

### Di-tert-butyl sulfoxide

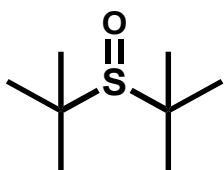

$^1\text{H-NMR}$  (400 MHz,  $d_4$ -MeOD)  $\delta$  (ppm): 1.37 (s, 18H).

Published elsewhere<sup>9</sup>:  $^1\text{H-NMR}$  (400 MHz,  $\text{CDCl}_3$ )  $\delta$  (ppm): 1.12 (s, 18H).

### Di-tert-butyl sulfone

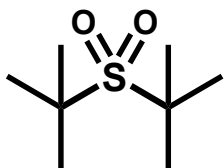

Not observed.

Published elsewhere<sup>9</sup>:  $^1\text{H-NMR}$  (400 MHz,  $\text{CDCl}_3$ )  $\delta$  (ppm): 1.31 (s, 18H).

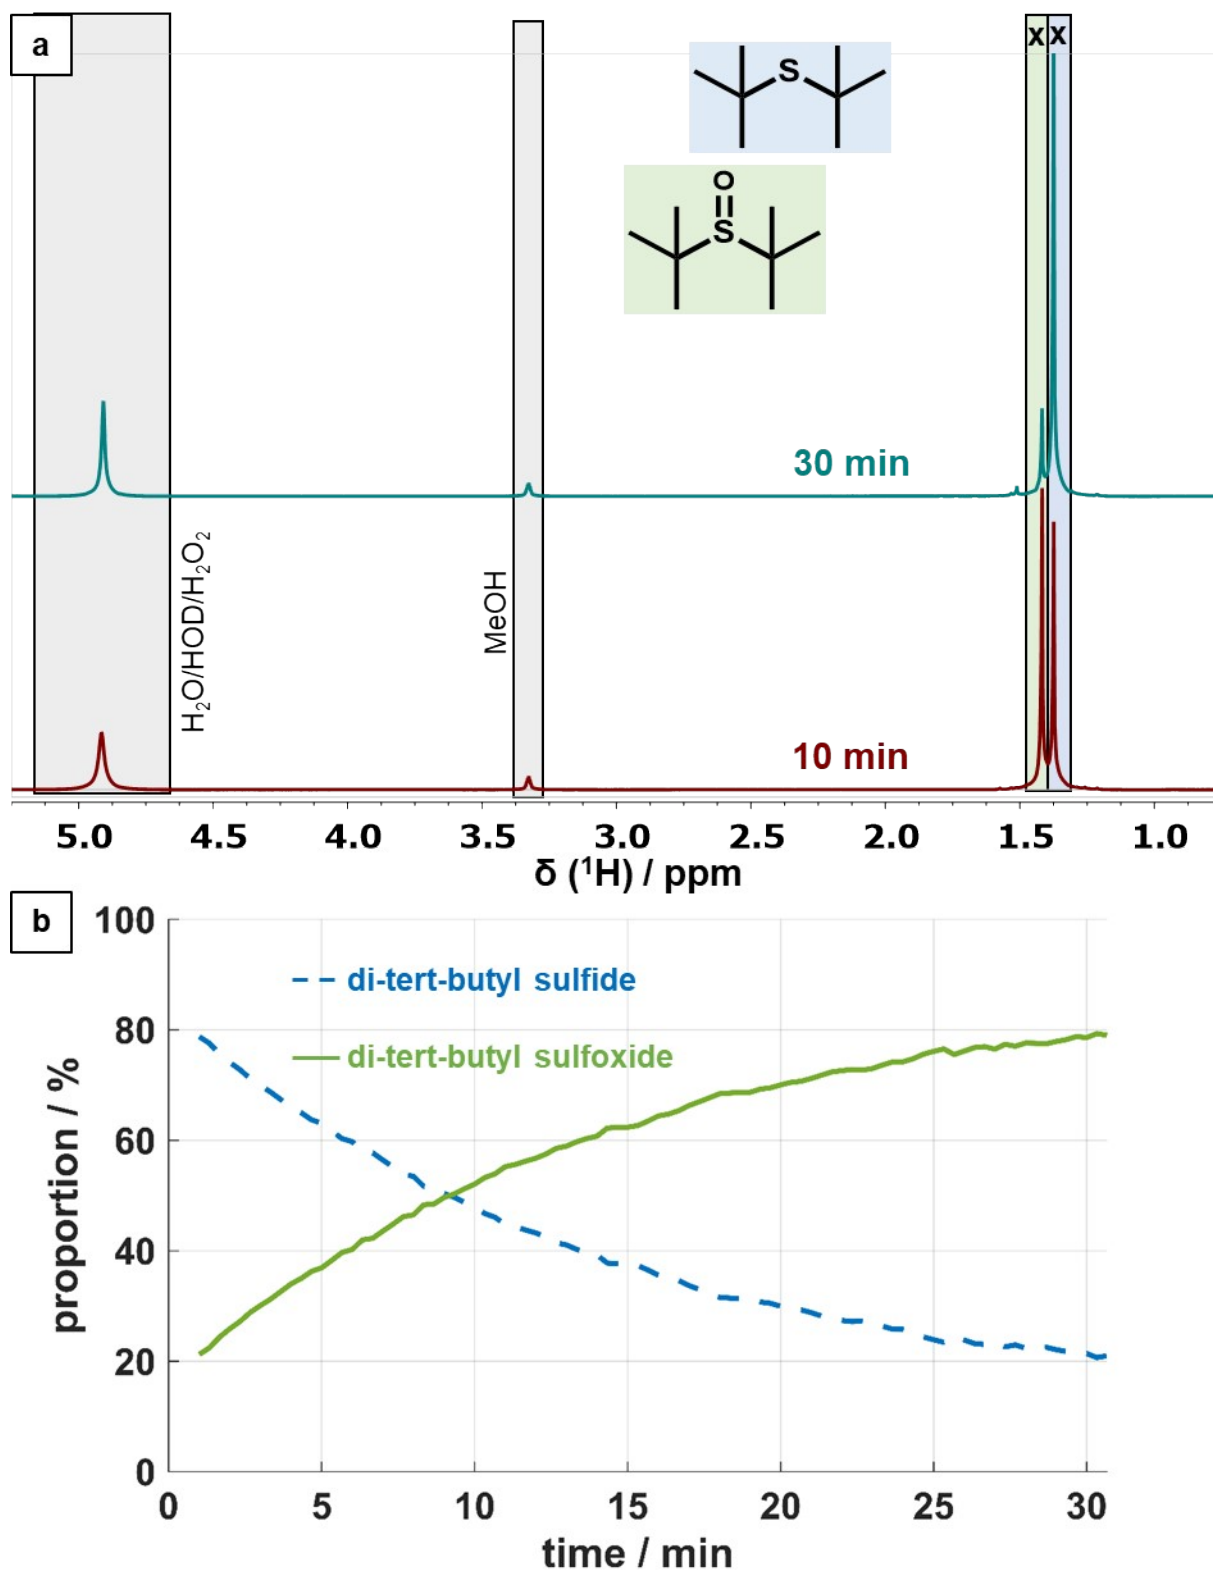

**Fig. S13.** (a)  $^1\text{H}$ -NMR spectra of a standard catalysis (0.04 mmol di-tert-butyl sulfide, 0.06 mmol  $\text{H}_2\text{O}_2$  (60%), 0.85 mg  $\text{WO}_{3-x}$  nanorods in 0.6 mL of methanol- $d_4$ ) after 10 and 30 min, x marking the peaks used for integration. (b) Time-dependent composition during the catalysis based on  $^1\text{H}$ -NMR data.



### Diphenyl sulfide

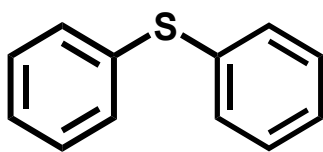

$^1\text{H-NMR}$  (400 MHz,  $d_4$ -MeOD)  $\delta$  (ppm): 7.33-7.24 (m, 10H).

Published elsewhere<sup>5</sup>:  $^1\text{H-NMR}$  (400 MHz,  $\text{CDCl}_3$ )  $\delta$  (ppm): 7.39 (d,  $J = 7.4$  Hz, 4H), 7.34 (dd,  $J = 9.9, 4.8$  Hz, 4H), 7.28 (dd,  $J = 7.6, 5.1$  Hz, 2H).

### Diphenyl sulfoxide

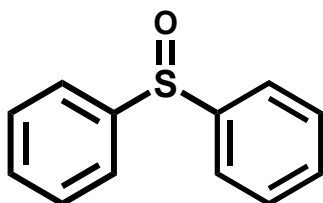

$^1\text{H-NMR}$  (400 MHz,  $d_4$ -MeOD)  $\delta$  (ppm): 7.72-7.69 (m, 4H), 7.55-7.53 (m, 6H).

Published elsewhere<sup>6</sup>:  $^1\text{H-NMR}$  (400 MHz,  $\text{CDCl}_3$ )  $\delta$  (ppm): 7.66-7.64 (m, 4H), 7.49-7.42 (m, 6H).

### Diphenyl sulfone

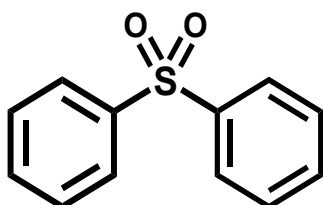

Not observed.

Published elsewhere<sup>6</sup>:  $^1\text{H-NMR}$  (400 MHz,  $\text{CDCl}_3$ )  $\delta$  (ppm): 7.96-7.94 (m, 4H), 7.59-7.49 (m, 6H).

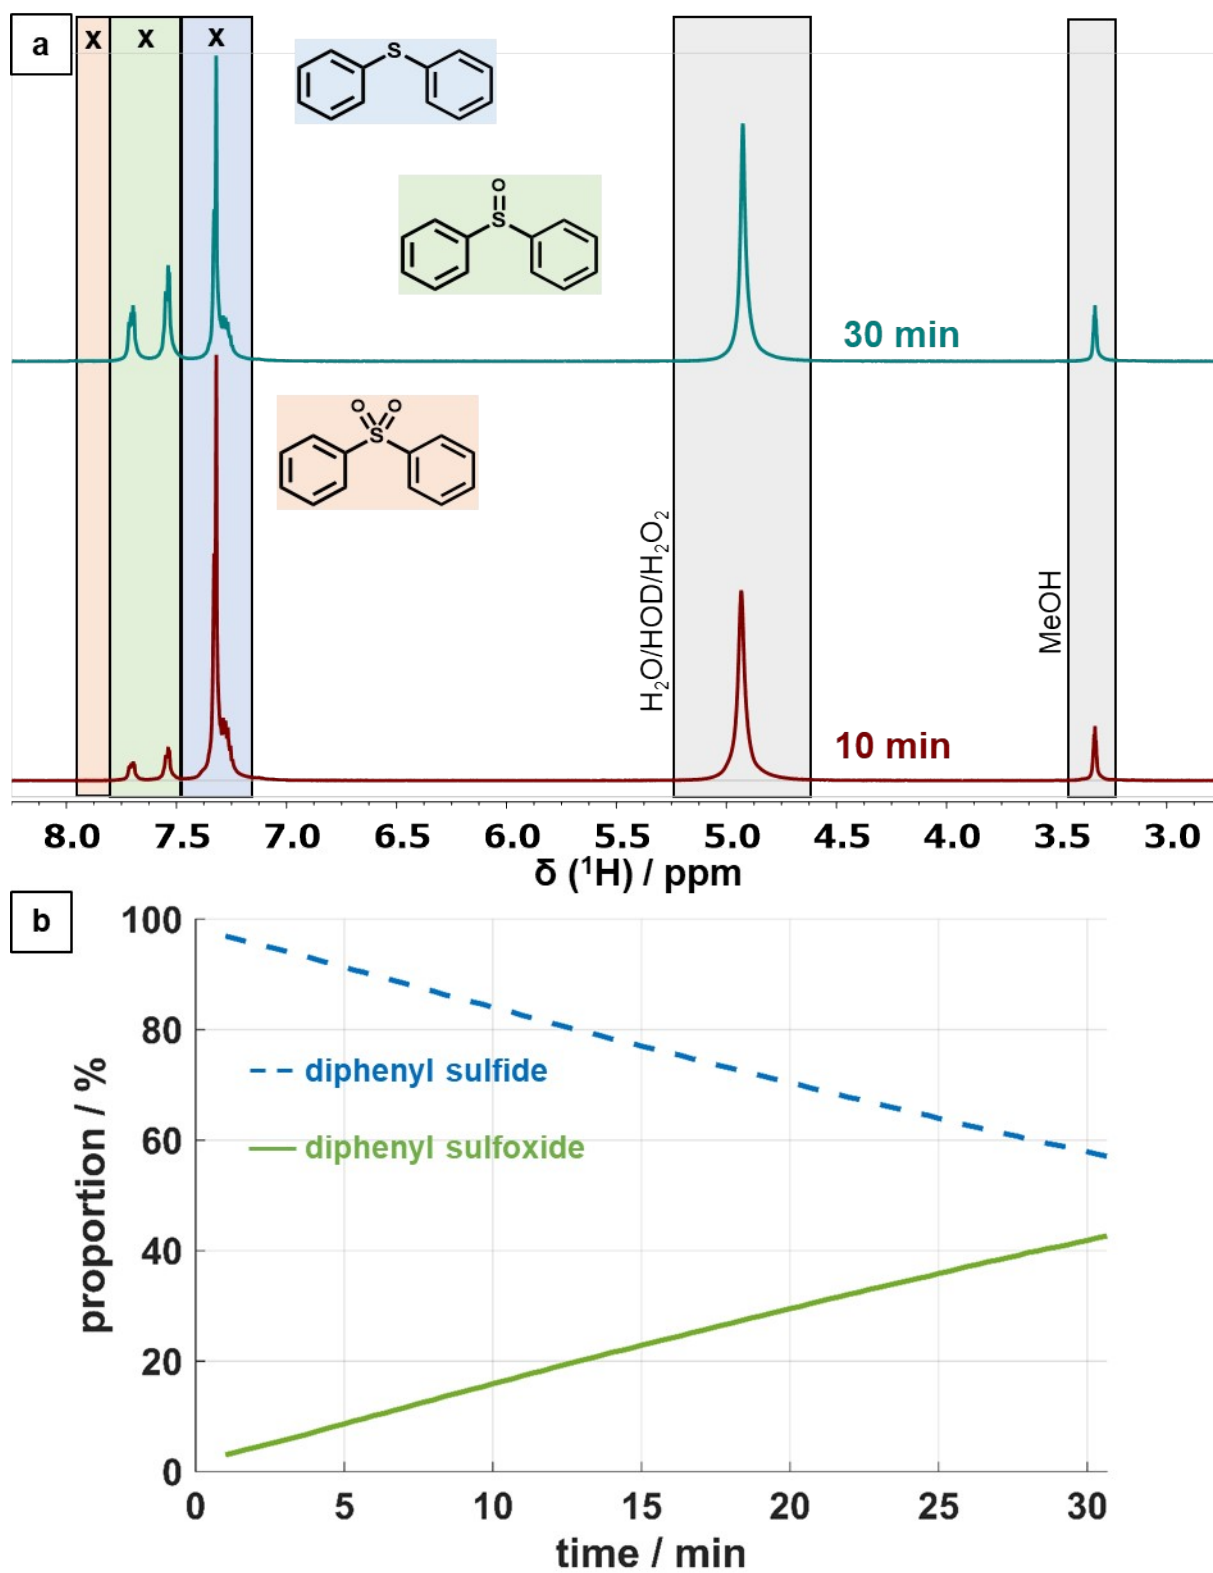

**Fig. S14.** (a)  $^1\text{H}$ -NMR spectra of a standard catalysis (0.04 mmol diphenyl sulfide, 0.06 mmol  $\text{H}_2\text{O}_2$  (60 %), 0.85 mg  $\text{WO}_{3-x}$  nanorods in 0.6 mL of methanol- $d_4$ ) after 10 and 30 min, x marking the peaks used for integration. (b) Time-dependent composition during the catalysis based on  $^1\text{H}$ -NMR data.

### Dibenzyl sulfide

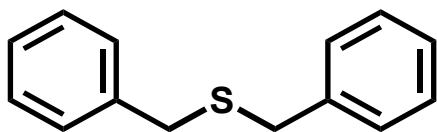

$^1\text{H-NMR}$  (400 MHz,  $\text{d}_4\text{-MeOD}$ )  $\delta$  (ppm): 7.31-7.23 (m, 10H), 3.61 (s, 4H).

Published elsewhere<sup>10</sup>:  $^1\text{H-NMR}$  (400 MHz,  $\text{CDCl}_3$ )  $\delta$  (ppm): 7.26-7.14 (m, 10H), 3.55 (s, 4H).

### Dibenzyl sulfoxide

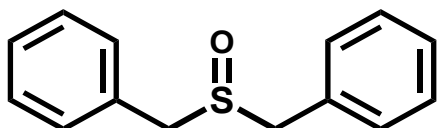

$^1\text{H-NMR}$  (400 MHz,  $\text{d}_4\text{-MeOD}$ )  $\delta$  (ppm): 7.41-7.36 (m, 10H), 4.20 (d,  $J = 13.0$ , 2H), 3.98 (d,  $J = 13.0$ , 2H).

Published elsewhere<sup>6</sup>:  $^1\text{H-NMR}$  (400 MHz,  $\text{CDCl}_3$ )  $\delta$  (ppm): 7.38-7.24 (m, 10H), 3.91 (d,  $J = 12.0$ , 2H), 3.86 (d,  $J = 12.0$ , 2H).

### Dibenzyl sulfone

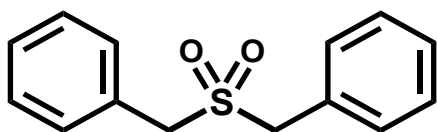

$^1\text{H-NMR}$  (400 MHz,  $\text{d}_4\text{-MeOD}$ )  $\delta$  (ppm): 7.60-7.55 (m, 10H), 4.38 (s, 4H).

Published elsewhere<sup>11</sup>:  $^1\text{H-NMR}$  (400 MHz,  $\text{CDCl}_3$ )  $\delta$  (ppm): 7.40-7.46 (m, 10H), 4.16 (s, 4H).

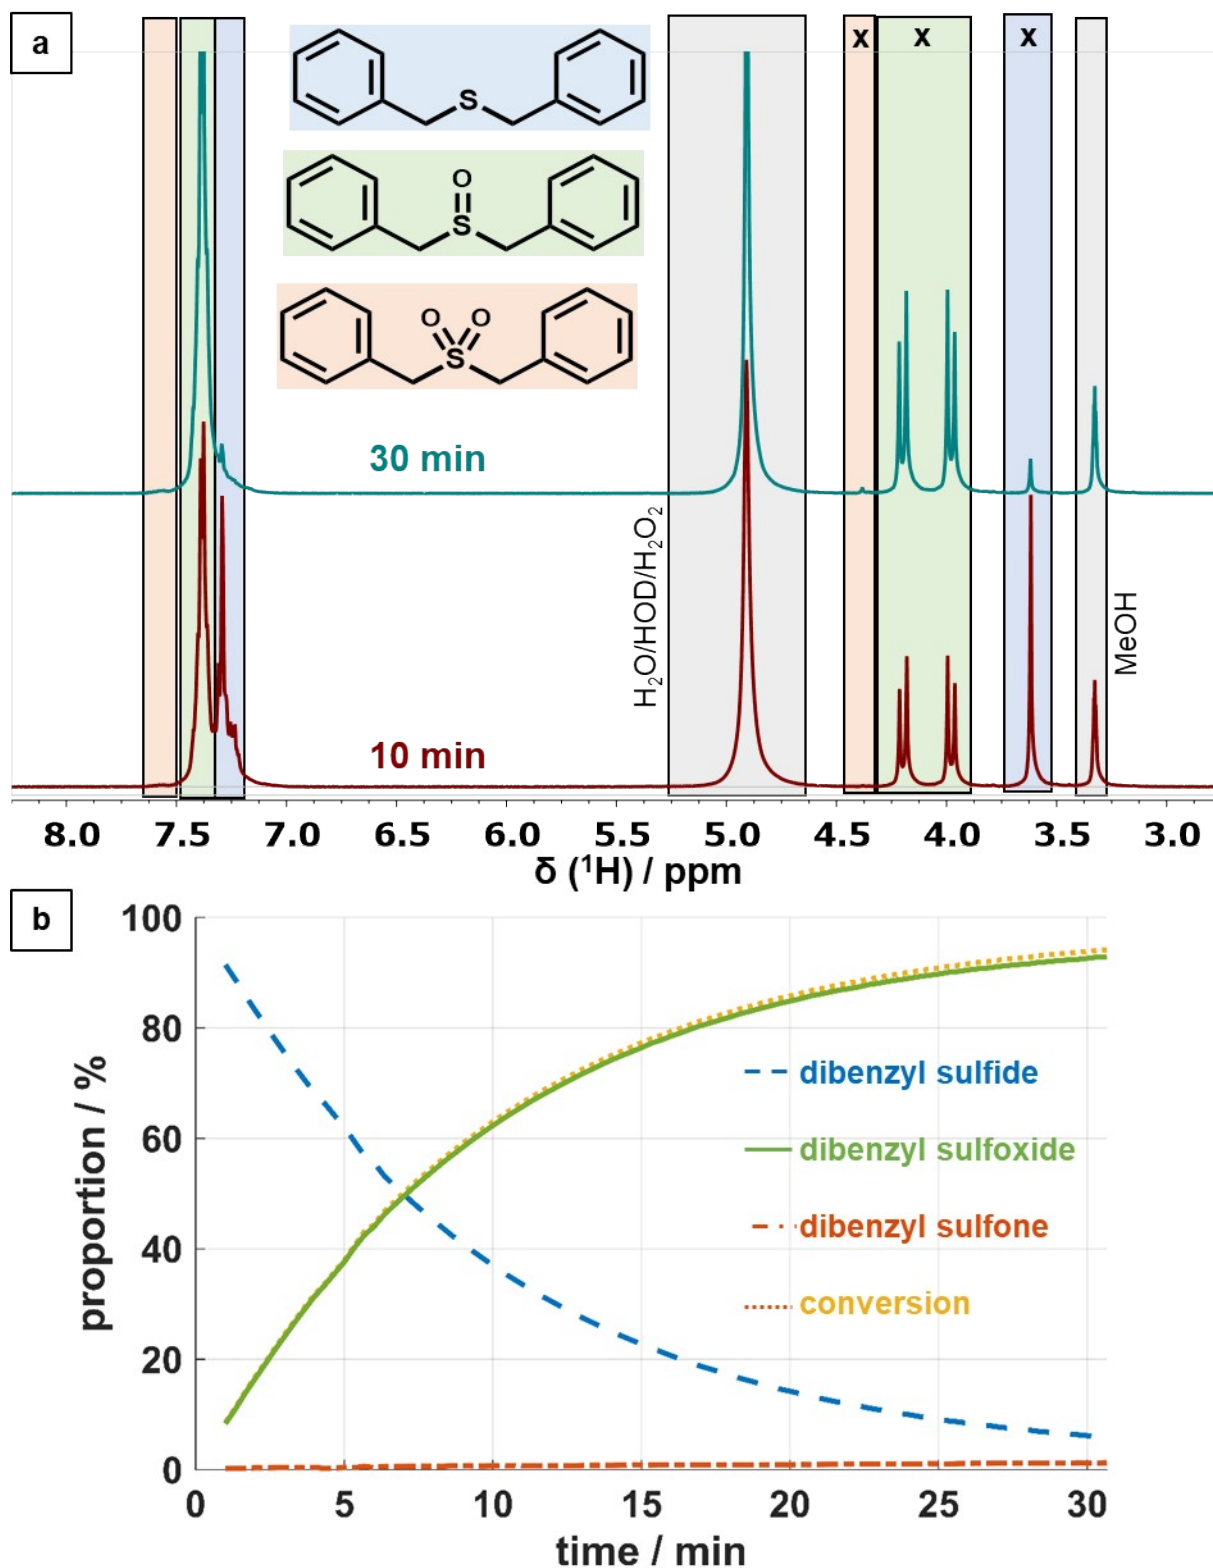

**Fig. S15.** a)  $^1\text{H}$ -NMR spectra of a standard catalysis (0.04 mmol dibenzyl sulfide, 0.06 mmol  $\text{H}_2\text{O}_2$  (60%), 0.85 mg  $\text{WO}_{3-x}$  nanorods in 0.6 mL of methanol- $d_4$ ) after 10 and 30 min, x marking the peaks used for integration. (b) Time-dependent composition during the catalysis based on  $^1\text{H}$ -NMR data.

#### 4-Nitrothioanisole (4-nitrophenyl methyl sulfide)

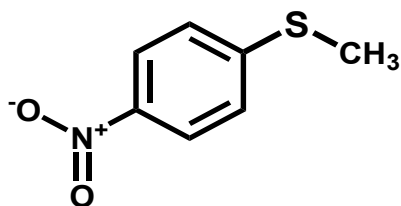

$^1\text{H-NMR}$  (400 MHz,  $d_4$ -MeOD)  $\delta$  (ppm): 8.16 (d,  $J = 9.0$  Hz, 2H), 7.42 (d,  $J = 9.0$  Hz, 2H), 2.59 (s, 3H).

Published elsewhere<sup>12</sup>:  $^1\text{H-NMR}$  (400 MHz,  $\text{CDCl}_3$ )  $\delta$  (ppm): 8.24-8.04 (m, 2H), 7.34-7.14 (m, 2H), 2.54 (s, 3H).

#### 4-Nitrophenyl methyl sulfoxide

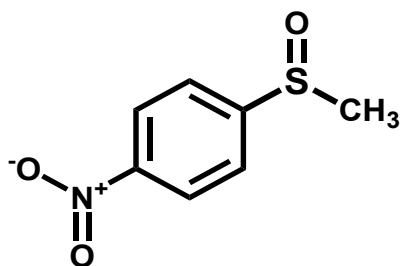

$^1\text{H-NMR}$  (400 MHz,  $d_4$ -MeOD)  $\delta$  (ppm): 8.45 (d,  $J = 8.9$  Hz, 2H), 7.96 (d,  $J = 8.9$  Hz, 2H), 2.89 (s, 3H).

Published elsewhere<sup>13</sup>:  $^1\text{H-NMR}$  (300 MHz,  $\text{CDCl}_3$ )  $\delta$  (ppm): 8.36 (d,  $J = 8.7$  Hz, 2H), 7.82 (d,  $J = 8.7$  Hz, 2H), 2.78 (s, 3H).

#### 4-Nitrophenyl methyl sulfone

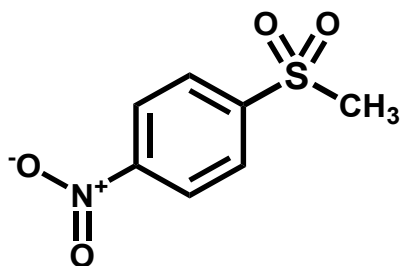

Not observed.

Published elsewhere<sup>13</sup>:  $^1\text{H-NMR}$  (300 MHz,  $\text{CDCl}_3$ )  $\delta$  (ppm): 8.43 (d,  $J = 8.8$  Hz, 2H), 8.16 (d,  $J = 8.8$  Hz, 2H), 3.12 (s, 3H).

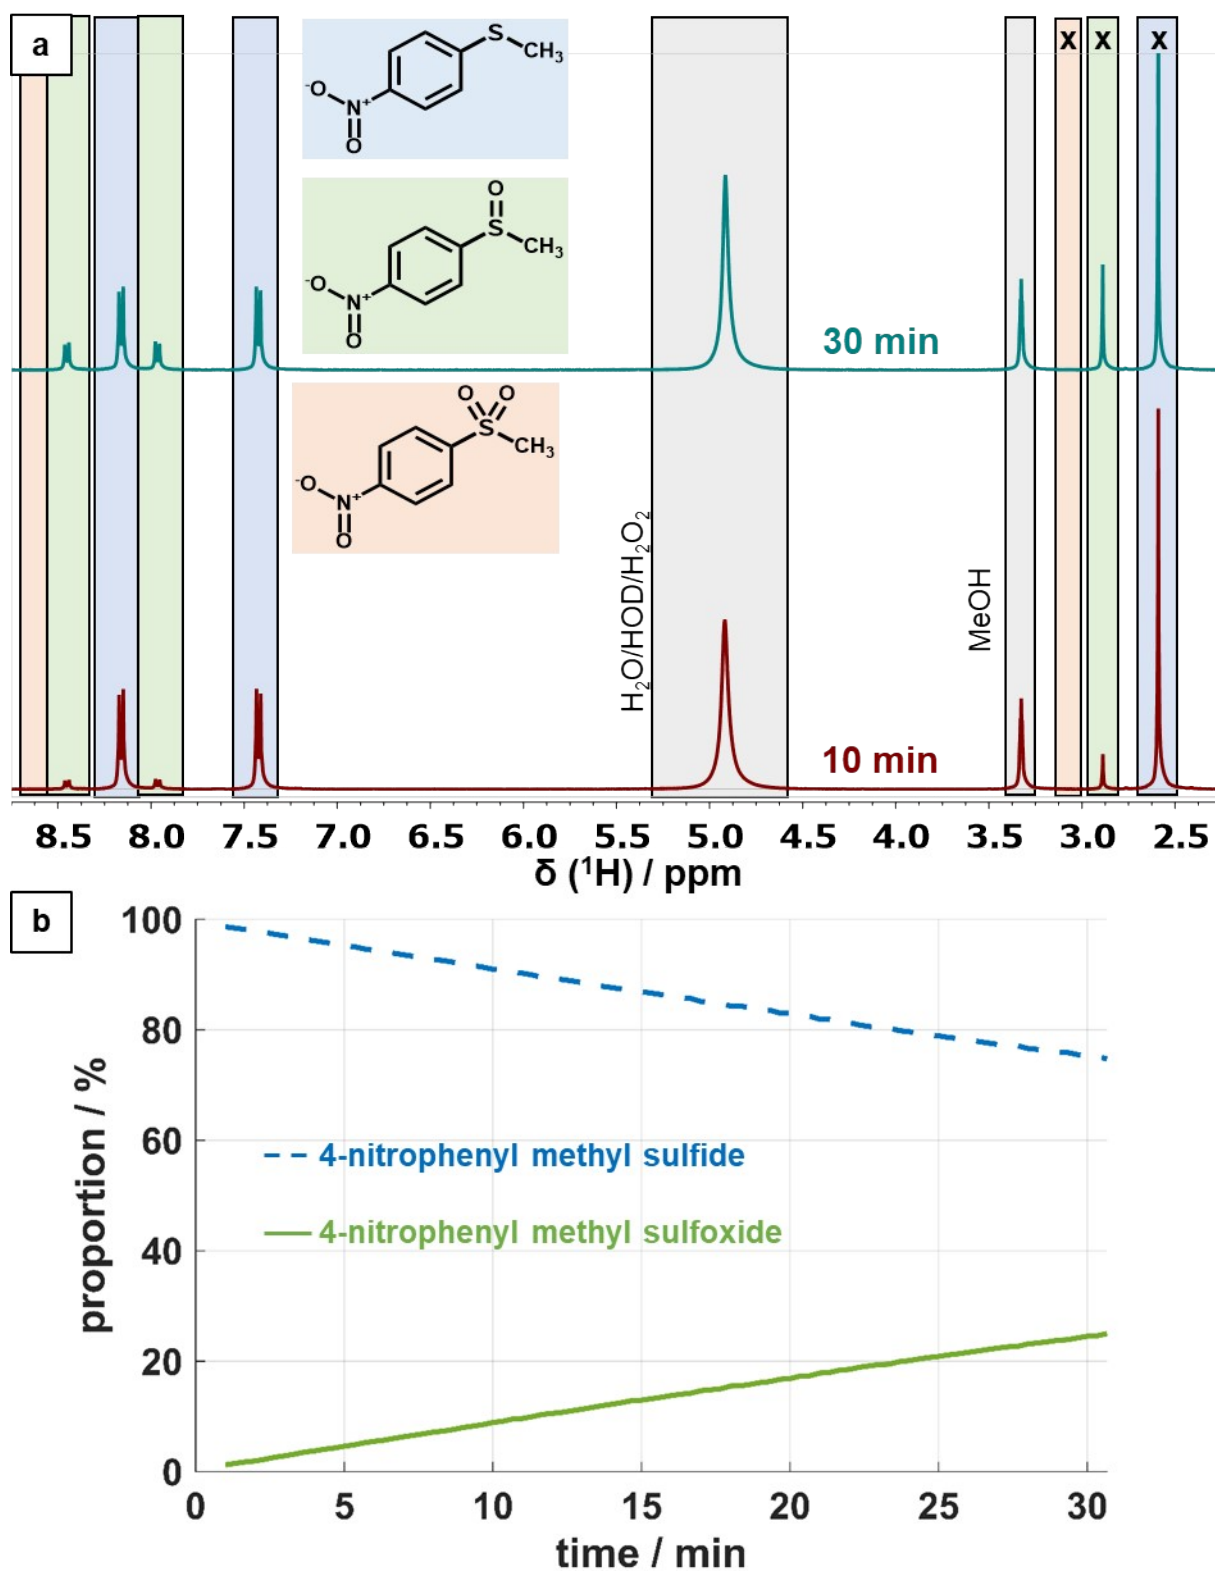

**Fig. S16.** (a)  $^1\text{H-NMR}$  spectra of a standard catalysis (0.04 mmol 4-nitrophenyl methyl sulfide, 0.06 mmol  $\text{H}_2\text{O}_2$  (60 %), 0.85 mg  $\text{WO}_{3-x}$  nanorods in 0.6 mL of methanol- $d_4$ ) after 10 and 30 min, x marking the peaks used for integration. (b) Time-dependent composition during the catalysis based on  $^1\text{H-NMR}$  data.

#### 4-Methoxythioanisole (4-methoxyphenyl methyl sulfide)

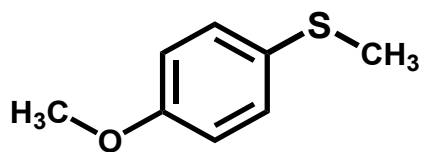

$^1\text{H-NMR}$  (400 MHz,  $d_4$ -MeOD)  $\delta$  (ppm): 7.27 (d,  $J = 8.8$  Hz, 2H), 6.88 (d,  $J = 8.8$  Hz, 2H), 3.78 (s, 3H), 2.42 (s, 3H).

Published elsewhere<sup>5</sup>:  $^1\text{H-NMR}$  (400 MHz,  $\text{CDCl}_3$ )  $\delta$  (ppm): 7.23 (d,  $J = 8.6$  Hz, 2H), 6.81 (d,  $J = 8.6$  Hz, 2H), 3.75 (s, 3H), 2.40 (s, 3H).

#### 4-Methoxyphenyl methyl sulfoxide

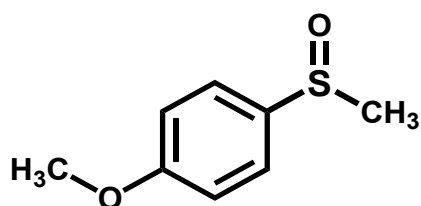

$^1\text{H-NMR}$  (400 MHz,  $d_4$ -MeOD)  $\delta$  (ppm): 7.68 (d,  $J = 8.7$  Hz, 2H), 7.15 (d,  $J = 8.7$  Hz, 2H), 3.88 (s, 3H), 2.79 (s, 3H).

Published elsewhere<sup>13</sup>:  $^1\text{H-NMR}$  (300 MHz,  $\text{CDCl}_3$ )  $\delta$  (ppm): 7.53-7.58 (m, 2H), 7.01-6.96 (m, 2H), 3.81 (s, 3H), 2.65 (s, 3H).

#### 4-Methoxyphenyl methyl sulfone

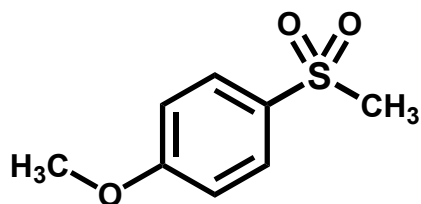

$^1\text{H-NMR}$  (400 MHz,  $d_4$ -MeOD)  $\delta$  (ppm): 7.89 (d,  $J = 8.4$  Hz, 2H), <sup>a</sup>(2H), <sup>a</sup>(3H), 3.01 (s, 3H).

Published elsewhere<sup>13</sup>:  $^1\text{H-NMR}$  (300 MHz,  $\text{CDCl}_3$ )  $\delta$  (ppm): 7.87 (d,  $J = 8.8$  Hz, 2H), 7.02 (d,  $J = 8.8$  Hz, 2H), 3.89 (s, 3H), 3.03 (s, 3H).

a. Signal intensity partially too low for assignment.

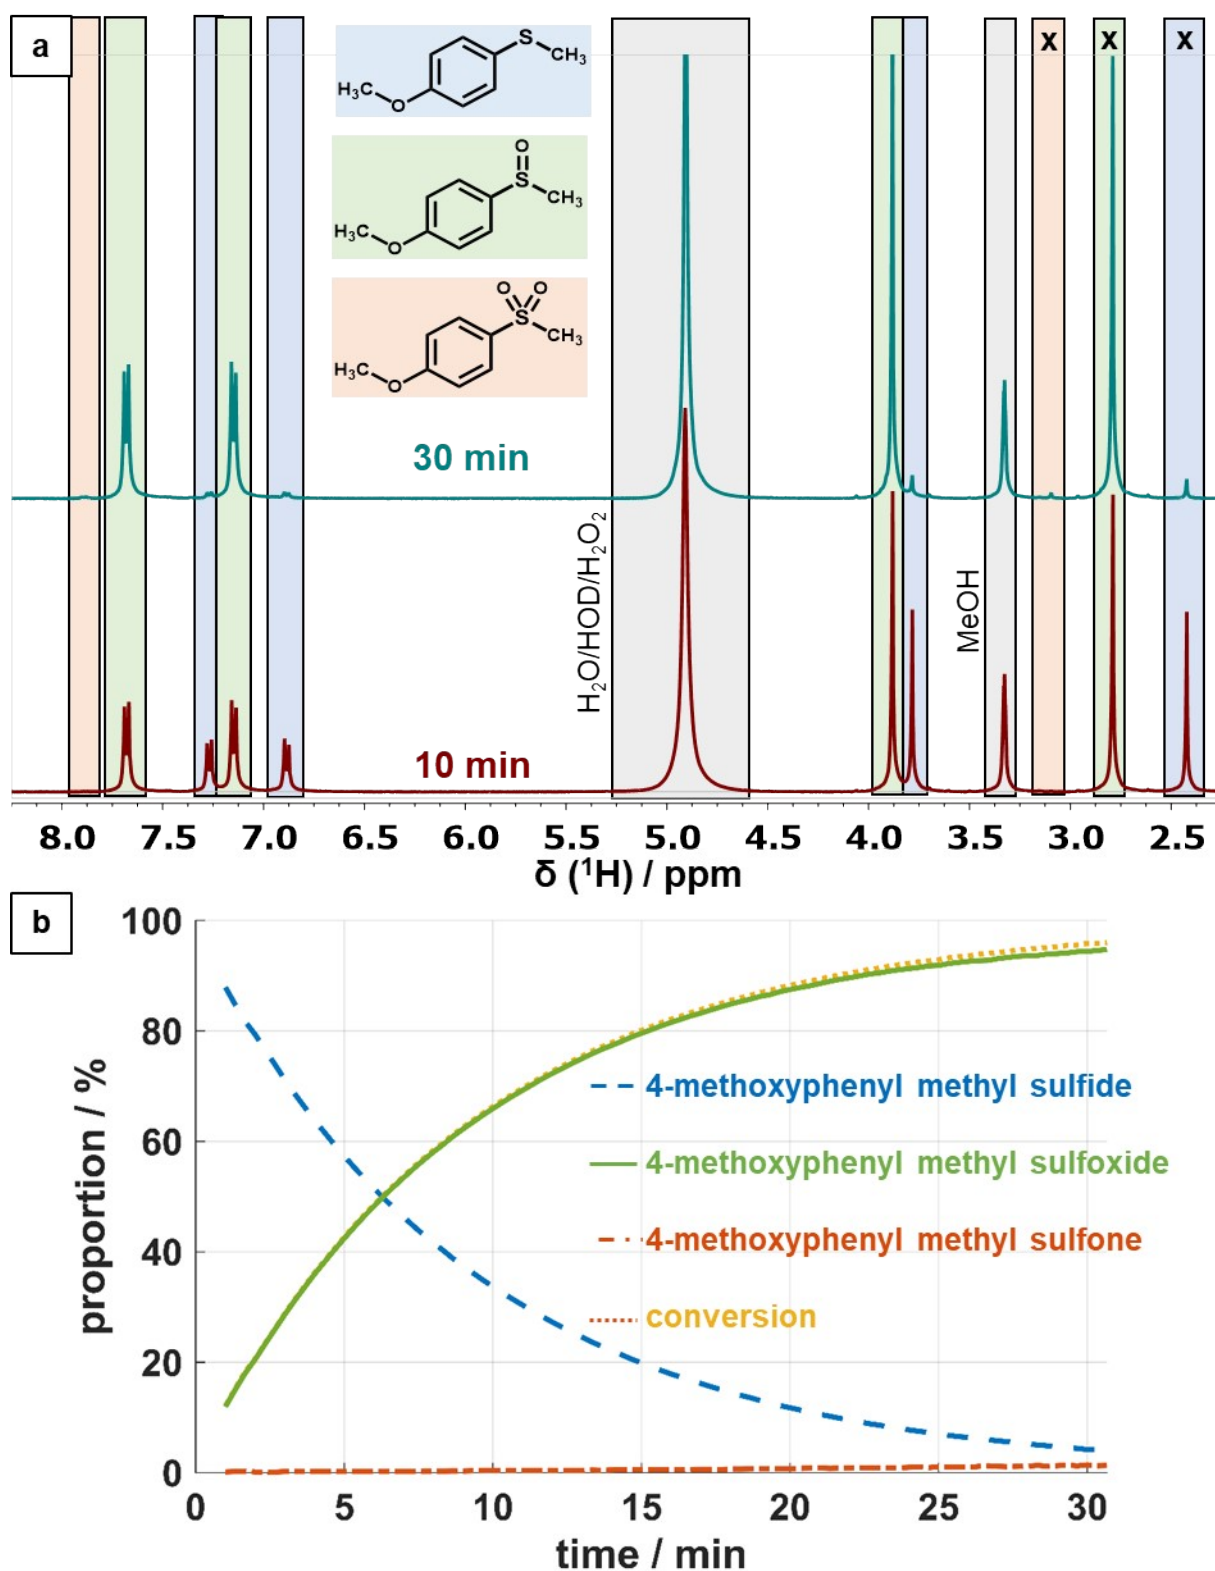

**Fig. S17.** (a)  $^1\text{H}$ -NMR spectra of a standard catalysis (0.04 mmol 4-methoxyphenyl methyl sulfide, 0.06 mmol  $\text{H}_2\text{O}_2$  (60%), 0.85 mg  $\text{WO}_{3-x}$  nanorods in 0.6 mL of methanol- $d_4$ ) after 10 and 30 min, x marking the peaks used for integration. (b) Time-dependent composition during the catalysis based on  $^1\text{H}$ -NMR data.



#### 4-Aminothioanisole (4-aminophenyl methyl sulfide)

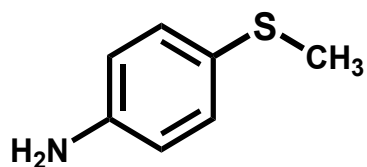

$^1\text{H-NMR}$  (400 MHz,  $d_4$ -MeOD)  $\delta$  (ppm): 7.14 (d,  $J = 8.6$  Hz, 2H), 6.68 (d,  $J = 8.6$  Hz, 2H), 2.37 (s, 3H).

Published elsewhere<sup>12</sup>:  $^1\text{H-NMR}$  (400 MHz,  $\text{CDCl}_3$ )  $\delta$  (ppm): 7.21-7.11 (m, 2H), 6.65-6.60 (m, 2H), 3.38 (s, 2H), 2.41 (s, 3H).

#### 4-Aminophenyl methyl sulfoxide

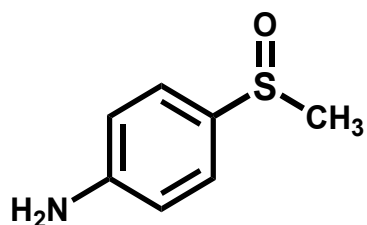

$^1\text{H-NMR}$  (400 MHz,  $d_4$ -MeOD)  $\delta$  (ppm): 7.46 (d,  $J = 8.7$  Hz, 2H), 6.80 (d,  $J = 8.7$  Hz, 2H), 2.76 (s, 3H).

Published elsewhere<sup>14</sup>:  $^1\text{H-NMR}$  (400 MHz,  $\text{CDCl}_3$ )  $\delta$  (ppm): 7.45 (d,  $J = 8.8$  Hz, 2H), 6.76 (d,  $J = 8.8$  Hz, 2H), 3.79 (s, 2H), 2.69 (s, 3H).

#### 4-Aminophenyl methyl sulfone

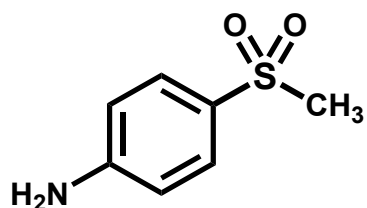

Not observed.

Published elsewhere<sup>15</sup>:  $^1\text{H-NMR}$  (400 MHz,  $\text{CDCl}_3$ )  $\delta$  (ppm): 7.66 (d,  $J = 8.5$  Hz, 2H), 6.69 (d,  $J = 8.5$  Hz, 2H), 4.26 (s, 2H), 2.99 (s, 3H).

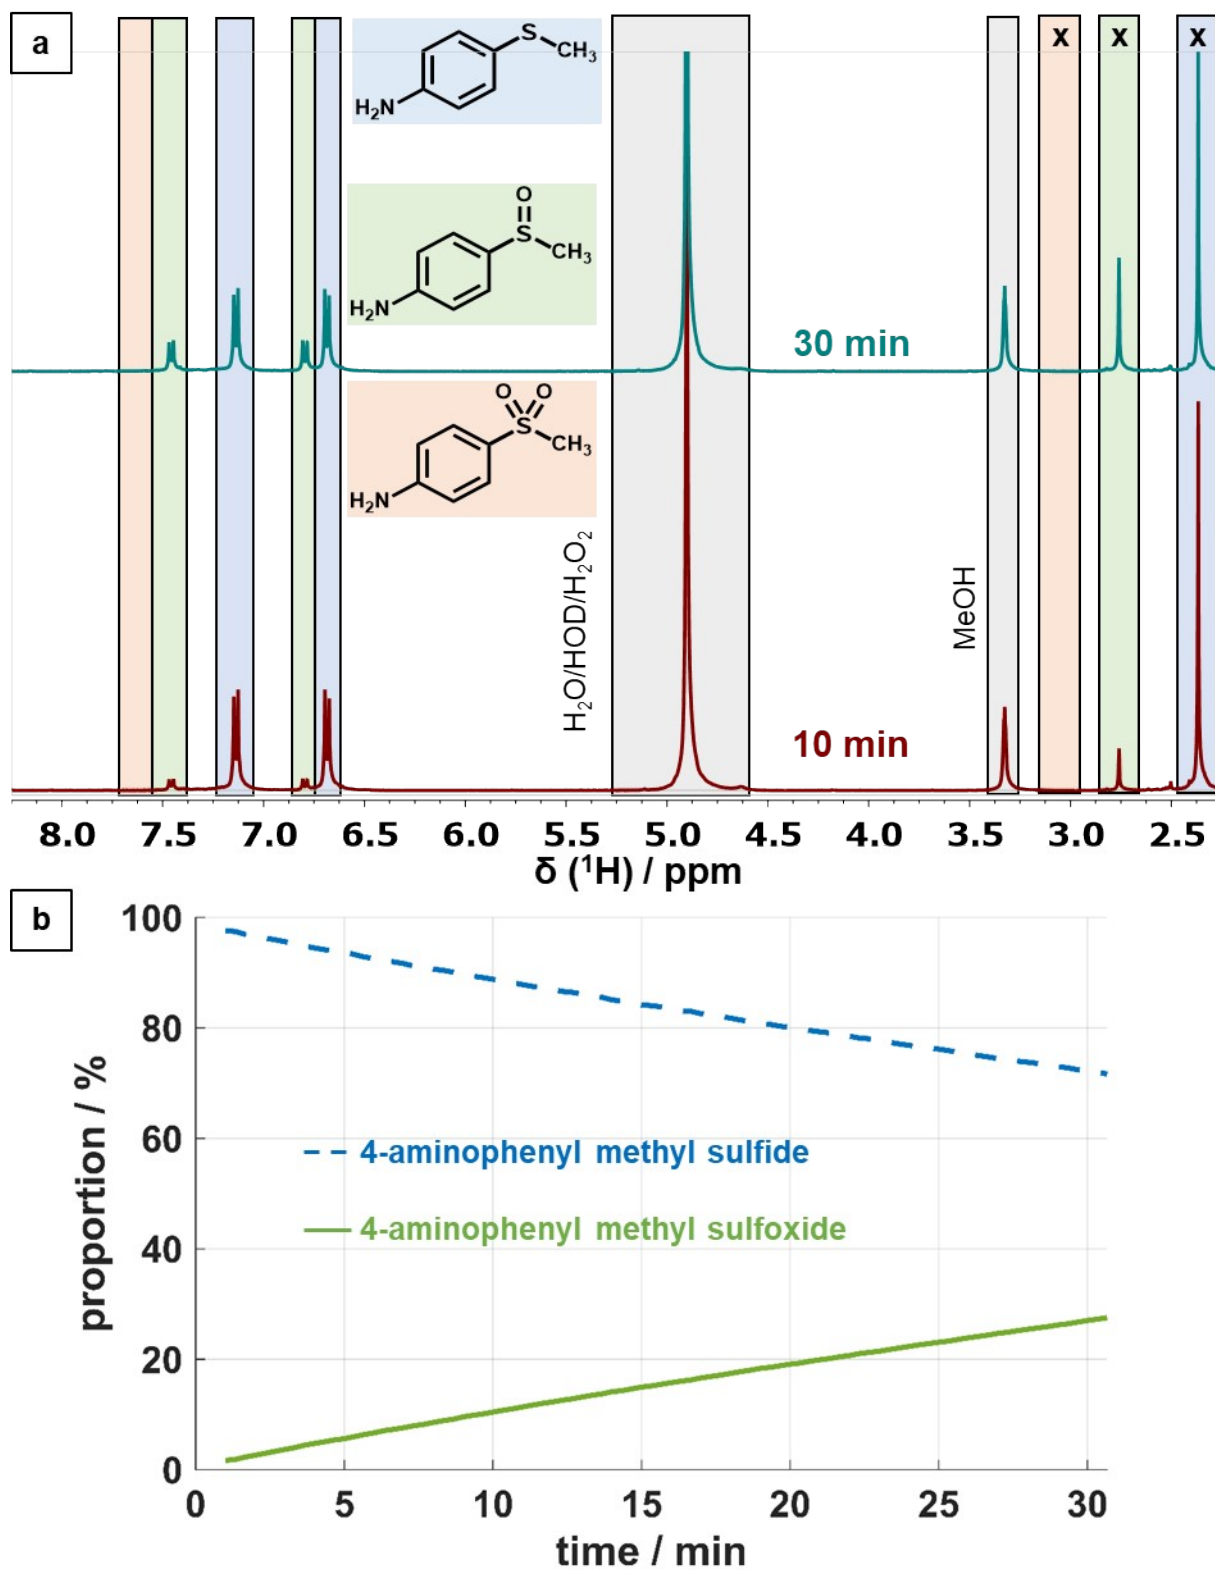

**Fig. S18.** (a)  $^1\text{H-NMR}$  spectra of a standard catalysis (0.04 mmol 4-aminophenyl methyl sulfide, 0.06 mmol  $\text{H}_2\text{O}_2$  (60%), 0.85 mg  $\text{WO}_{3-x}$  nanorods in 0.6 mL of methanol- $d_4$ ) after 10 and 30 min, x marking the peaks used for integration. (b) Time-dependent composition during the catalysis based on  $^1\text{H-NMR}$  data.

**Dimethyl sulfoxide (DMSO)**

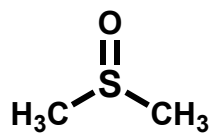

<sup>1</sup>H-NMR (400 MHz, d<sub>4</sub>-MeOD) δ (ppm): 2.68 (s, 3H).

Published elsewhere<sup>16</sup>: <sup>1</sup>H-NMR (400 MHz, CDCl<sub>3</sub>) δ (ppm): 2.50 (s, 6H).

**Dimethyl sulfone**

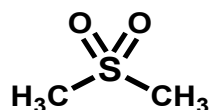

<sup>1</sup>H-NMR (400 MHz, d<sub>4</sub>-MeOD) δ (ppm): 3.03 (s, 3H).

Published elsewhere<sup>16</sup>: <sup>1</sup>H-NMR (400 MHz, CDCl<sub>3</sub>) δ (ppm): 2.97 (s, 6H).

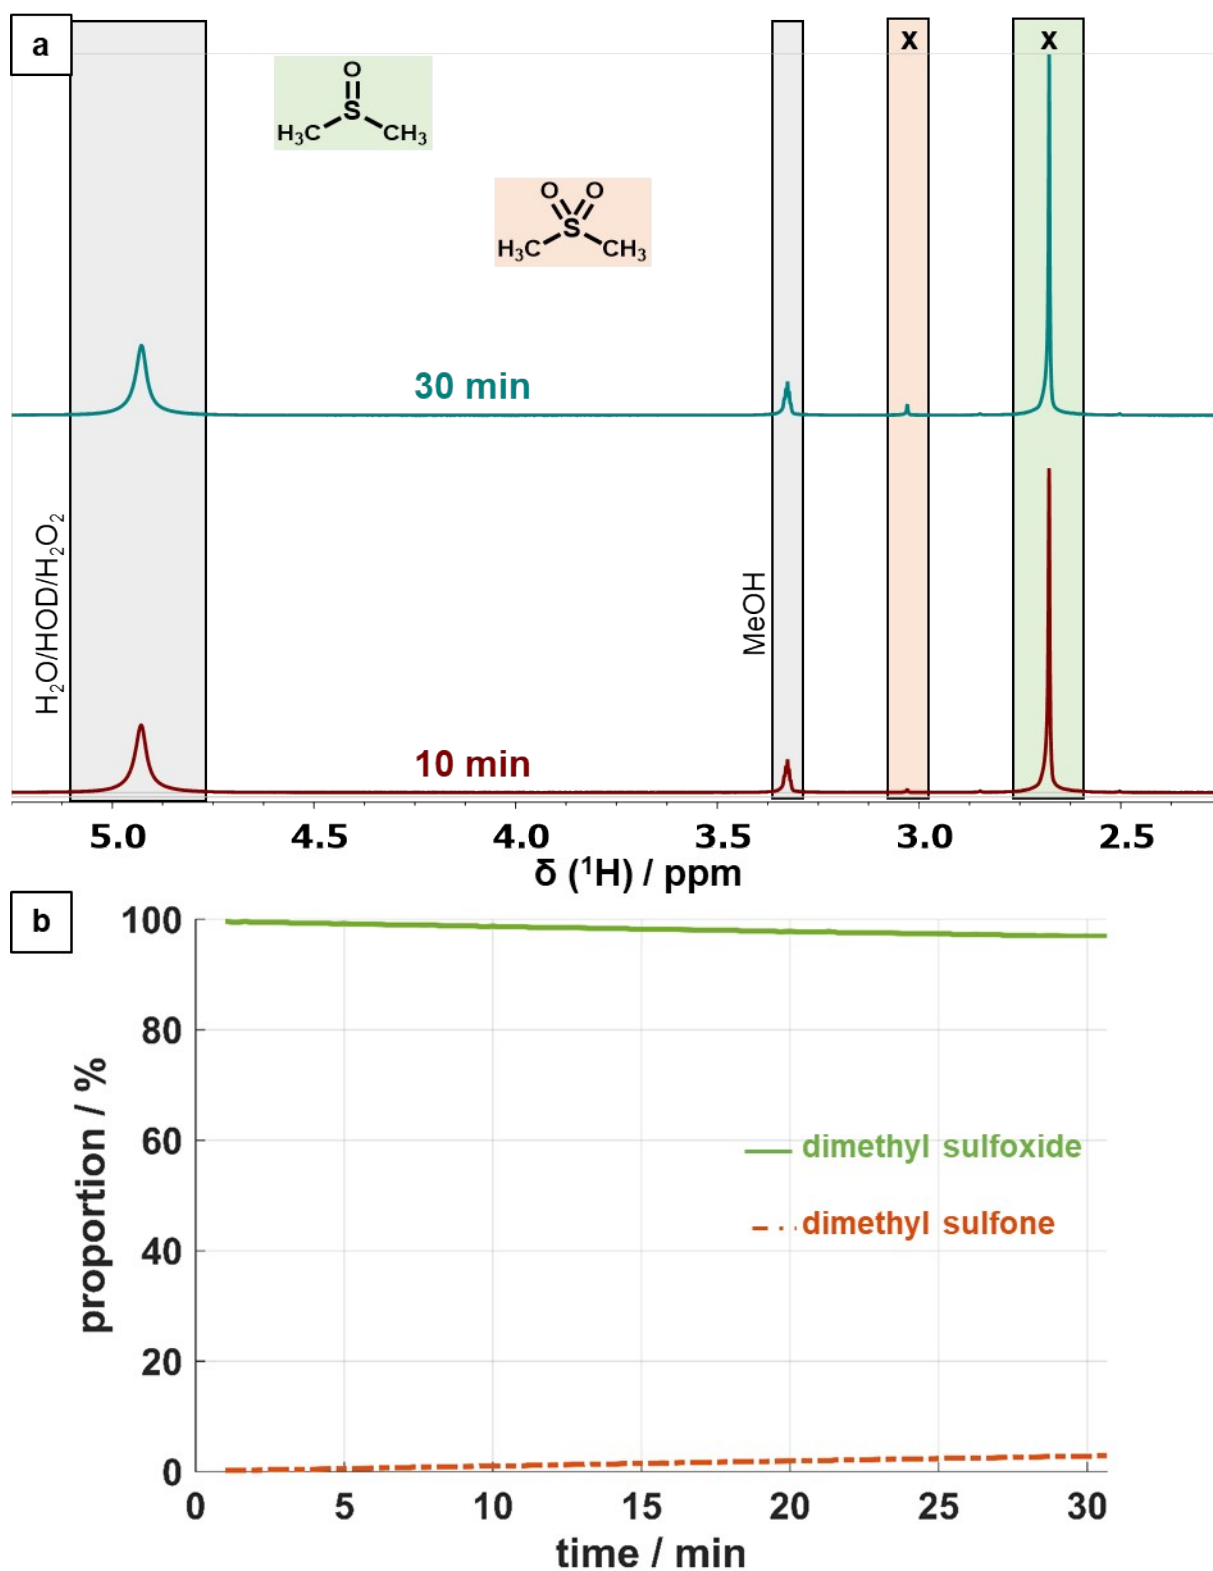

**Fig. S19.** (a)  $^1\text{H-NMR}$  spectra of a catalysis using sulfoxides (0.04 mmol DMSO, 0.06 mmol  $\text{H}_2\text{O}_2$  (60%), 0.85 mg  $\text{WO}_{3-x}$  nanorods in 0.6 mL of methanol- $d_4$ ) after 10 and 30 min, x marking the peaks used for integration. (b) Time-dependent composition during the catalysis based on  $^1\text{H-NMR}$  data.

### Dibenzothiophene (DBT)

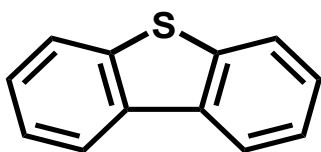

$^1\text{H-NMR}$  (400 MHz,  $d_4$ -MeOD)  $\delta$  (ppm): 8.27-8.24 (m, 2H), 7.91-7.89 (m, 2H), 7.51-7.49 (m, 4H).

Published elsewhere<sup>17</sup>:  $^1\text{H-NMR}$  (400 MHz,  $\text{CDCl}_3$ )  $\delta$  (ppm): 8.21-8.13 (m, 2H), 7.91-7.82 (m, 2H), 7.51-42 (m, 4H).

### Dibenzothiophene sulfoxide

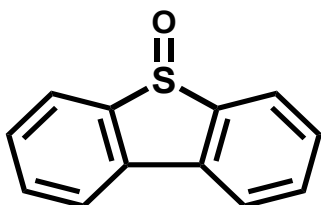

$^1\text{H-NMR}$  (400 MHz,  $d_4$ -MeOD)  $\delta$  (ppm): 8.05 (dd,  $J = 7.7, 4.3$  Hz, 4H), 7.75 (t,  $J = 7.6$  Hz, 2H), 7.63 (t,  $J = 7.7$  Hz, 2H).

Published elsewhere<sup>16</sup>:  $^1\text{H-NMR}$  (400 MHz,  $\text{CDCl}_3$ )  $\delta$  (ppm): 7.99 (d,  $J = 7.6$  Hz, 2H), 7.82 (d,  $J = 7.7$  Hz, 2H), 7.61 (t,  $J = 7.5$  Hz, 2H), 7.51 (t,  $J = 7.5$  Hz, 2H).

### Dibenzothiophene sulfone

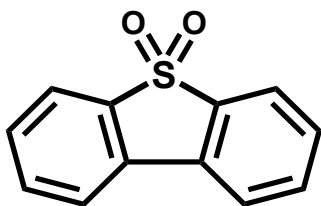

$^1\text{H-NMR}$  (400 MHz,  $d_4$ -MeOD)  $\delta$  (ppm): 8.08-8.03 (m, 4H), 7.80 (t,  $J = 8.8$  Hz, 2H), 7.66 (t,  $J = 8.4$  Hz, 2H).

Published elsewhere<sup>16</sup>:  $^1\text{H-NMR}$  (400 MHz,  $\text{CDCl}_3$ )  $\delta$  (ppm): 7.83-7.78 (m, 4H), 7.66-7.62 (m, 2H), 7.55-7.51 (m, 2H).

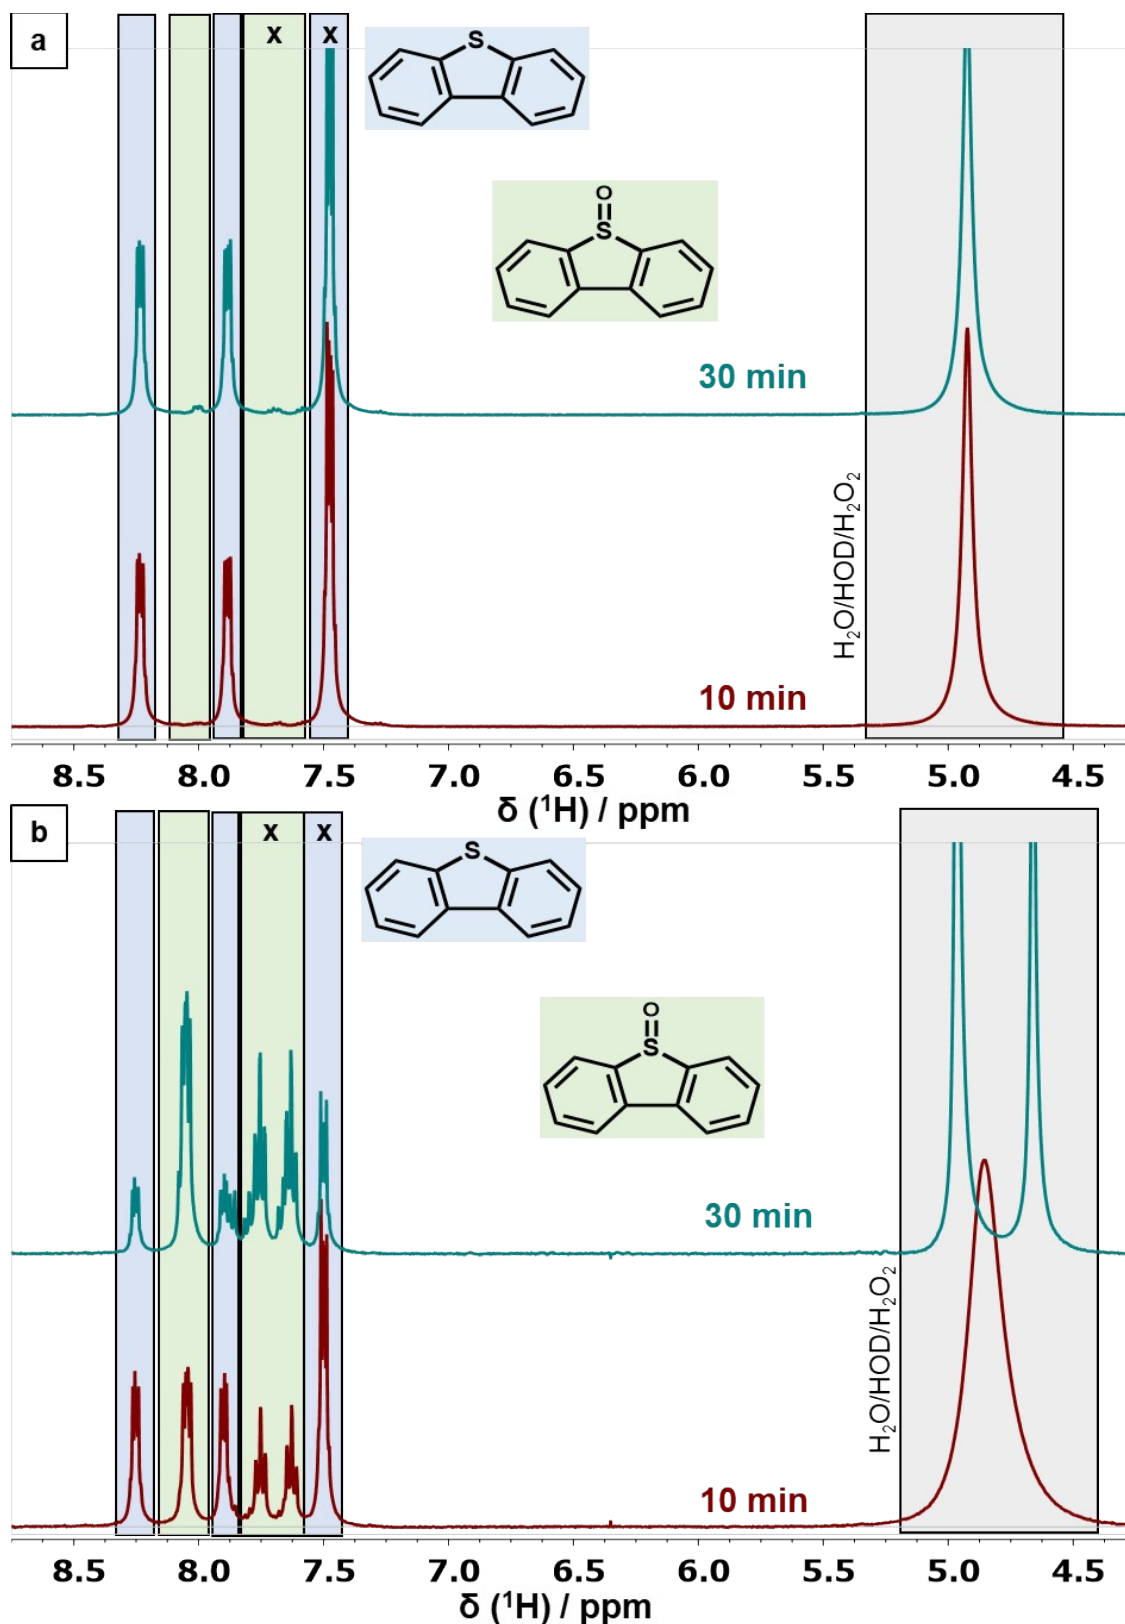

**Fig. S20.** (a)  $^1\text{H-NMR}$  spectra of a standard catalysis (0.04 mmol dibenzothiophen, 0.06 mmol  $\text{H}_2\text{O}_2$  (60 %), 0.85 mg  $\text{WO}_{3-x}$  nanorods in 0.6 mL of methanol- $\text{d}_4$ ) after 10 and 30 min. (b)  $^1\text{H-NMR}$  spectra of an *ex situ* catalysis (0.04 mmol dibenzothiophen, 0.06 mmol  $\text{H}_2\text{O}_2$  (60 %), 8.5 mg  $\text{WO}_{3-x}$  nanorods in 1 mL of methanol- $\text{d}_4$ ) after 10 and 30 min. x marking the peaks used for integration.

## References

- 1 R. Dören, B. Leibauer, M. A. Lange, E. Schechtel, L. Prädel, M. Panthöfer, M. Mondeshki and W. Tremel, *Nanoscale*, 2021, **13**, 8146–8162.
- 2 O. S. Hammond, K. J. Edler, D. T. Bowron and L. Torrente-Murciano, *Nat. Commun.*, 2017, **8**, 14150.
- 3 E. Schechtel, R. Dören, H. Frerichs, M. Panthöfer, M. Mondeshki and W. Tremel, *Langmuir*, 2019, **35**, 12518–12531.
- 4 C.-T. Dinh, T.-D. Nguyen, F. Kleitz and T.-O. Do, *ACS Nano*, 2009, **3**, 3737–3743.
- 5 R. Ma, A.-H. Liu, C.-B. Huang, X.-D. Li and L.-N. He, *Green Chem.*, 2013, **15**, 1274.
- 6 B. Yu, C.-X. Guo, C.-L. Zhong, Z.-F. Diao and L.-N. He, *Tetrahedron Lett.*, 2014, **55**, 1818–1821.
- 7 E. P. Levanova, V. S. Nikonova, V. A. Grabel'nykh, N. V. Russavskaya, A. I. Albanov, I. B. Rozentsveig and N. A. Korchevin, *Russ. J. Gen. Chem.*, 2018, **88**, 383–388.
- 8 Spectral Database for Organic Compounds (SDBS), [https://sdb.sdb.aist.go.jp/sdb/cgi-bin/direct\\_frame\\_top.cgi](https://sdb.sdb.aist.go.jp/sdb/cgi-bin/direct_frame_top.cgi), (accessed 29 June 2021).
- 9 Y. Li, S. A.-E.-A. Rizvi, D. Hu, D. Sun, A. Gao, Y. Zhou, J. Li and X. Jiang, *Angew. Chem. Int. Ed.*, 2019, **58**, 13499–13506.
- 10 E. Voutyritsa, M. Garreau, M. G. Kokotou, I. Triandafillidi, J. Waser and C. G. Kokotos, *Chemistry*, 2020, **26**, 14453–14460.
- 11 B. Zhang, S. Li, S. Yue, M. Cokoja, M.-D. Zhou, S.-L. Zang and F. E. Kühn, *J. Organomet. Chem.*, 2013, **744**, 108–112.
- 12 L. Blank, M. Fagnoni, S. Protti and M. Rueping, *Synthesis*, 2019, **51**, 1243–1252.
- 13 C. Yang, Q. Jin, H. Zhang, J. Liao, J. Zhu, B. Yu and J. Deng, *Green Chem.*, 2009, **11**, 1401.
- 14 Y. Monguchi, T. Ida, T. Maejima, T. Yanase, Y. Sawama, Y. Sasai, S. Kondo and H. Sajiki, *Adv. Synth. Catal.*, 2014, **356**, 313–318.
- 15 D. Han, S. Li, S. Xia, M. Su and J. Jin, *Chemistry*, 2020, **26**, 12349–12354.
- 16 B. Yu, A.-H. Liu, L.-N. He, B. Li, Z.-F. Diao and Y.-N. Li, *Green Chem.*, 2012, **14**, 957.
- 17 B. Higginson, J. Sanjosé-Orduna, Y. Gu and R. Martin, *Synlett*, 2021.
